# Supplementary material for: Effects of chronic exposure to clothianidin on the earthworm Lumbricus terrestris
Source: PeerJ. 2017 Apr 11;5:e3177. doi: 10.7717/peerj.3177 (PMC5390763; doi:10.7717/peerj.3177)
Supplement: Supplemental Information 1 [file peerj-05-3177-s001.xlsx]

## Sheet: Weight (g)
Bottle iD	Time	Food treated (ppb)	Soil treated (ppb)	No Worms	Mean weight worms (g)
CLD 1A - 0/1	0	0	0	4	16.55
CLD 1A - 0/1	4	0	0	4	18.86			GROUP A
CLD 1A - 0/1	8	0	0	4	12.63			Weight	Week 0	Week 4	Week 8	Week 12	Week 16
CLD 1A - 0/1	12	0	0	2	10.96			Control	3.60575	4.11592	4.20633	5.71833	6.26148
CLD 1A - 0/1	16	0	0	2	12.23			1ppb	3.23325	4.11593	4.06722	5.58094	6.24073
CLD 1A - 0/2	0	0	0	4	13.95			5ppb	3.15325	3.67796	4.29854	5.61688	6.2375
CLD 1A - 0/2	4	0	0	4	15.65			10ppb	2.96869	3.63159	4.26657	5.34604	5.33188
CLD 1A - 0/2	8	0	0	3	14.44			20ppb	3.20489	4.2126	4.0905	5.6315	7.01667
CLD 1A - 0/2	12	0	0	2	16			100ppb	2.9575	3.58717	4.01315	4.86042	5.98361
CLD 1A - 0/2	16	0	0	2	11.45
CLD 1A - 0/3	0	0	0	4	12.65
CLD 1A - 0/3	4	0	0	3	10.55			GROUP B
CLD 1A - 0/3	8	0	0	2	7.62			Weight	Week 0	Week 4	Week 8	Week 12	Week 16
CLD 1A - 0/3	12	0	0	1	5.05			Control	4.7205	6.2135	5.54142	6.08275	6.5077
CLD 1A - 0/3	16	0	0	1	5.31			1ppb	4.72625	6.01525	6.01258	6.47617	6.30358
CLD 1A - 0/4	0	0	0	4	13.21			5ppb	4.595	6.06375	5.703	6.60225	6.82742
CLD 1A - 0/4	4	0	0	4	14.57			10ppb	4.66575	6.01775	5.746	6.12875	6.41092
CLD 1A - 0/4	8	0	0	4	16.3			20ppb	4.65425	5.86842	5.46425	6.13333	6.40058
CLD 1A - 0/4	12	0	0	4	18.92			100ppb	4.54075	4.95625	4.9775	5.7962	6.16741
CLD 1A - 0/4	16	0	0	4	21.14
CLD 1A - 0/5	0	0	0	4	14.86
CLD 1A - 0/5	4	0	0	4	17.36			GROUP C
CLD 1A - 0/5	8	0	0	3	13.61			Weight	Week 0	Week 4	Week 8	Week 12	Week 16
CLD 1A - 0/5	12	0	0	2	12.64			Control	4.795	6.23925	5.7415	6.43283	7.12217
CLD 1A - 0/5	16	0	0	2	13.49			1ppb	4.643	6.1035	5.45642	6.39792	6.25542
CLD 1A - 0/6	0	0	0	4	15.04			5ppb	4.6835	6.12125	5.87058	6.83575	6.95542
CLD 1A - 0/6	4	0	0	4	17.08			10ppb	4.44825	5.659	5.61242	6.45375	6.56333
CLD 1A - 0/6	8	0	0	4	16.62			20ppb	4.41975	5.44608	5.53037	6.48009	6.68552
CLD 1A - 0/6	12	0	0	3	14.74			100ppb	4.71025	5.49425	5.15333	6.03775	6.225
CLD 1A - 0/6	16	0	0	2	13.44
CLD 1A - 0/7	0	0	0	4	15.73
CLD 1A - 0/7	4	0	0	4	18.06
CLD 1A - 0/7	8	0	0	4	17.9
CLD 1A - 0/7	12	0	0	2	12.93
CLD 1A - 0/7	16	0	0	2	15.32
CLD 1A - 0/8	0	0	0	4	11.93
CLD 1A - 0/8	4	0	0	4	15.21
CLD 1A - 0/8	8	0	0	4	16.55
CLD 1A - 0/8	12	0	0	3	15.17
CLD 1A - 0/8	16	0	0	3	15.9
CLD 1A - 0/9	0	0	0	4	16.44
CLD 1A - 0/9	4	0	0	4	18.61
CLD 1A - 0/9	8	0	0	3	16.33
CLD 1A - 0/9	12	0	0	3	20.53
CLD 1A - 0/9	16	0	0	3	22.48
CLD 1A - 0/10	0	0	0	4	13.87
CLD 1A - 0/10	4	0	0	4	15.17
CLD 1A - 0/10	8	0	0	4	13.84
CLD 1A - 0/10	12	0	0	2	8.65
CLD 1A - 0/10	16	0	0	0
CLD 1A - 1/1	0	0	1	4	14.73
CLD 1A - 1/1	4	0	1	4	16.94
CLD 1A - 1/1	8	0	1	3	12.31
CLD 1A - 1/1	12	0	1	3	15.16
CLD 1A - 1/1	16	0	1	3	15.82
CLD 1A - 1/2	0	0	1	4	14.48
CLD 1A - 1/2	4	0	1	4	18.78
CLD 1A - 1/2	8	0	1	4	19.28
CLD 1A - 1/2	12	0	1	4	23.09
CLD 1A - 1/2	16	0	1	4	24.79
CLD 1A - 1/3	0	0	1	4	11.98
CLD 1A - 1/3	4	0	1	3	10.13
CLD 1A - 1/3	8	0	1	1	4.08
CLD 1A - 1/3	12	0	1	1	5.97
CLD 1A - 1/3	16	0	1	1	7.43
CLD 1A - 1/4	0	0	1	4	16.97
CLD 1A - 1/4	4	0	1	3	17.12
CLD 1A - 1/4	8	0	1	3	16.2
CLD 1A - 1/4	12	0	1	3	19.24
CLD 1A - 1/4	16	0	1	3	20.67
CLD 1A - 1/5	0	0	1	4	11.34
CLD 1A - 1/5	4	0	1	2	6.51
CLD 1A - 1/5	8	0	1	2	6.71
CLD 1A - 1/5	12	0	1	2	9.13
CLD 1A - 1/5	16	0	1	2	9.58
CLD 1A - 1/6	0	0	1	4	11.49
CLD 1A - 1/6	4	0	1	0
CLD 1A - 1/6	8	0	1	0
CLD 1A - 1/6	12	0	1	0
CLD 1A - 1/6	16	0	1	0
CLD 1A - 1/7	0	0	1	4	11.81
CLD 1A - 1/7	4	0	1	1	4.86
CLD 1A - 1/7	8	0	1	1	2.8
CLD 1A - 1/7	12	0	1	0
CLD 1A - 1/7	16	0	1	0
CLD 1A - 1/8	0	0	1	4	13.23
CLD 1A - 1/8	4	0	1	3	13.38
CLD 1A - 1/8	8	0	1	3	13.13
CLD 1A - 1/8	12	0	1	3	15.97
CLD 1A - 1/8	16	0	1	3	18.45
CLD 1A - 1/9	0	0	1	4	12.23
CLD 1A - 1/9	4	0	1	4	13.23
CLD 1A - 1/9	8	0	1	2	8.37
CLD 1A - 1/9	12	0	1	2	10.58
CLD 1A - 1/9	16	0	1	2	11.27
CLD 1A - 1/10	0	0	1	4	11.07
CLD 1A - 1/10	4	0	1	4	12.59
CLD 1A - 1/10	8	0	1	2	6.97
CLD 1A - 1/10	12	0	1	1	6.26
CLD 1A - 1/10	16	0	1	1	7.56
CLD 1A - 5/1	0	0	5	4	12.57
CLD 1A - 5/1	4	0	5	3	11.45
CLD 1A - 5/1	8	0	5	3	11.95
CLD 1A - 5/1	12	0	5	3	14.67
CLD 1A - 5/1	16	0	5	2	12.93
CLD 1A - 5/2	0	0	5	4	11.54
CLD 1A - 5/2	4	0	5	4	12.79
CLD 1A - 5/2	8	0	5	3	10.52
CLD 1A - 5/2	12	0	5	1	5.34
CLD 1A - 5/2	16	0	5	1	5.8
CLD 1A - 5/3	0	0	5	4	11.22
CLD 1A - 5/3	4	0	5	4	12.97
CLD 1A - 5/3	8	0	5	3	11.8
CLD 1A - 5/3	12	0	5	2	10.54
CLD 1A - 5/3	16	0	5	2	12.9
CLD 1A - 5/4	0	0	5	4	13.98
CLD 1A - 5/4	4	0	5	2	8.71
CLD 1A - 5/4	8	0	5	1	5.65
CLD 1A - 5/4	12	0	5	1	7.56
CLD 1A - 5/4	16	0	5	1	7.86
CLD 1A - 5/5	0	0	5	4	12.67
CLD 1A - 5/5	4	0	5	2	8.16
CLD 1A - 5/5	8	0	5	0
CLD 1A - 5/5	12	0	5	0
CLD 1A - 5/5	16	0	5	0
CLD 1A - 5/6	0	0	5	4	14.36
CLD 1A - 5/6	4	0	5	3	13.64
CLD 1A - 5/6	8	0	5	3	14.22
CLD 1A - 5/6	12	0	5	2	11.54
CLD 1A - 5/6	16	0	5	2	14.4
CLD 1A - 5/7	0	0	5	4	10.13
CLD 1A - 5/7	4	0	5	2	5.26
CLD 1A - 5/7	8	0	5	1	3.73
CLD 1A - 5/7	12	0	5	1	5.22
CLD 1A - 5/7	16	0	5	1	4.41
CLD 1A - 5/8	0	0	5	4	13.7
CLD 1A - 5/8	4	0	5	0
CLD 1A - 5/8	8	0	5	0
CLD 1A - 5/8	12	0	5	0
CLD 1A - 5/8	16	0	5	0
CLD 1A - 5/9	0	0	5	4	13.49
CLD 1A - 5/9	4	0	5	3	12.13
CLD 1A - 5/9	8	0	5	2	9.19
CLD 1A - 5/9	12	0	5	2	12.59
CLD 1A - 5/9	16	0	5	2	13.13
CLD 1A - 5/10	0	0	5	4	12.47
CLD 1A - 5/10	4	0	5	3	9.57
CLD 1A - 5/10	8	0	5	1	4.25
CLD 1A - 5/10	12	0	5	1	4.59
CLD 1A - 5/10	16	0	5	1	5.15
CLD 1A - 10/1	0	0	10	4	14.25
CLD 1A - 10/1	4	0	10	4	16.49
CLD 1A - 10/1	8	0	10	3	15.11
CLD 1A - 10/1	12	0	10	3	16.6
CLD 1A - 10/1	16	0	10	3	16.28
CLD 1A - 10/2	0	0	10	4	15.23
CLD 1A - 10/2	4	0	10	4	18.36
CLD 1A - 10/2	8	0	10	4	18.18
CLD 1A - 10/2	12	0	10	3	18.64
CLD 1A - 10/2	16	0	10	3	16.9
CLD 1A - 10/3	0	0	10	4	12.14
CLD 1A - 10/3	4	0	10	3	10.04
CLD 1A - 10/3	8	0	10	3	11.19
CLD 1A - 10/3	12	0	10	2	10.29
CLD 1A - 10/3	16	0	10	2	11.65
CLD 1A - 10/4	0	0	10	4	13.66
CLD 1A - 10/4	4	0	10	3	10.11
CLD 1A - 10/4	8	0	10	3	11.31
CLD 1A - 10/4	12	0	10	1	4.74
CLD 1A - 10/4	16	0	10	1	6.06
CLD 1A - 10/5	0	0	10	0	16.57
CLD 1A - 10/5	4	0	10	0	14.98
CLD 1A - 10/5	8	0	10	3	14.18
CLD 1A - 10/5	12	0	10	2	11.82
CLD 1A - 10/5	16	0	10	2	13.94
CLD 1A - 10/6	0	0	10	4	11.72
CLD 1A - 10/6	4	0	10	1	5.49
CLD 1A - 10/6	8	0	10	0
CLD 1A - 10/6	12	0	10	0
CLD 1A - 10/6	16	0	10	0
CLD 1A - 10/7	0	0	10	4	9.8
CLD 1A - 10/7	4	0	10	4	10.65
CLD 1A - 10/7	8	0	10	1	3.42
CLD 1A - 10/7	12	0	10	0
CLD 1A - 10/7	16	0	10	0
CLD 1A - 10/8	0	0	10	4	10.69
CLD 1A - 10/8	4	0	10	4	12.94
CLD 1A - 10/8	8	0	10	4	13.24
CLD 1A - 10/8	12	0	10	3	13.72
CLD 1A - 10/8	16	0	10	3	12.27
CLD 1A - 10/9	0	0	10	4	13.57
CLD 1A - 10/9	4	0	10	4	16.37
CLD 1A - 10/9	8	0	10	3	15.79
CLD 1A - 10/9	12	0	10	3	17.38
CLD 1A - 10/9	16	0	10	3	13.14
CLD 1A - 10/10	0	0	10	4	14.1
CLD 1A - 10/10	4	0	10	4	18.69
CLD 1A - 10/10	8	0	10	4	18.39
CLD 1A - 10/10	12	0	10	3	14.58
CLD 1A - 10/10	16	0	10	3	12.81
CLD 1A - 20/1	0	0	20	4	16.38
CLD 1A - 20/1	4	0	20	3	13.65
CLD 1A - 20/1	8	0	20	2	8.88
CLD 1A - 20/1	12	0	20	2	11.48
CLD 1A - 20/1	16	0	20	2	13.32
CLD 1A - 20/2	0	0	20	4	12.92
CLD 1A - 20/2	4	0	20	1	5.48
CLD 1A - 20/2	8	0	20	1	5.69
CLD 1A - 20/2	12	0	20	1	7.02
CLD 1A - 20/2	16	0	20	1	9.42
CLD 1A - 20/3	0	0	20	4	15.93
CLD 1A - 20/3	4	0	20	4	19.1
CLD 1A - 20/3	8	0	20	4	18.35
CLD 1A - 20/3	12	0	20	4	20.39
CLD 1A - 20/3	16	0	20	3	19.45
CLD 1A - 20/4	0	0	20	4	13.35
CLD 1A - 20/4	4	0	20	2	6.38
CLD 1A - 20/4	8	0	20	2	5.48
CLD 1A - 20/4	12	0	20	1	6.34
CLD 1A - 20/4	16	0	20	1	7.82
CLD 1A - 20/5	0	0	20	4	11.35
CLD 1A - 20/5	4	0	20	0
CLD 1A - 20/5	8	0	20	0
CLD 1A - 20/5	12	0	20	0
CLD 1A - 20/5	16	0	20	0
CLD 1A - 20/6	0	0	20	4	14.27
CLD 1A - 20/6	4	0	20	4	14.25
CLD 1A - 20/6	8	0	20	0
CLD 1A - 20/6	12	0	20	0
CLD 1A - 20/6	16	0	20
CLD 1A - 20/7	0	0	20	4	13.21
CLD 1A - 20/7	4	0	20	0
CLD 1A - 20/7	8	0	20	0
CLD 1A - 20/7	12	0	20	0
CLD 1A - 20/7	16	0	20
CLD 1A - 20/8	0	0	20	0	13.01
CLD 1A - 20/8	4	0	20	3	12.09
CLD 1A - 20/8	8	0	20	2	5.99
CLD 1A - 20/8	12	0	20	1	3.96
CLD 1A - 20/8	16	0	20	1	4.7
CLD 1A - 20/9	0	0	20	4	13.13
CLD 1A - 20/9	4	0	20	3	11.44
CLD 1A - 20/9	8	0	20	0
CLD 1A - 20/9	12	0	20	0
CLD 1A - 20/9	16	0	20	0
CLD 1A - 20/10	0	0	20	4	13
CLD 1A - 20/10	4	0	20	1	4.3
CLD 1A - 20/10	8	0	20	0
CLD 1A - 20/10	12	0	20	0
CLD 1A - 20/10	16	0	20	0
CLD 1A - 100/1	0	0	100	4	10.26
CLD 1A - 100/1	4	0	100	4	10.1
CLD 1A - 100/1	8	0	100	1	3.12
CLD 1A - 100/1	12	0	100	0
CLD 1A - 100/1	16	0	100	0
CLD 1A - 100/2	0	0	100	4	12.27
CLD 1A - 100/2	4	0	100	3	10.4
CLD 1A - 100/2	8	0	100	3	10.12
CLD 1A - 100/2	12	0	100	0
CLD 1A - 100/2	16	0	100	0
CLD 1A - 100/3	0	0	100	4	9.11
CLD 1A - 100/3	4	0	100	2	7.28
CLD 1A - 100/3	8	0	100	1	3.8
CLD 1A - 100/3	12	0	100	1	3.97
CLD 1A - 100/3	16	0	100	1	5.4
CLD 1A - 100/4	0	0	100	4	14.93
CLD 1A - 100/4	4	0	100	4	16.56
CLD 1A - 100/4	8	0	100	4	16.6
CLD 1A - 100/4	12	0	100	4	17.63
CLD 1A - 100/4	16	0	100	3	16.07
CLD 1A - 100/5	0	0	100	4	12.43
CLD 1A - 100/5	4	0	100	4	13.97
CLD 1A - 100/5	8	0	100	2	8.45
CLD 1A - 100/5	12	0	100	2	11.17
CLD 1A - 100/5	16	0	100	2	13.54
CLD 1A - 100/6	0	0	100	4	11.6
CLD 1A - 100/6	4	0	100	1	3.48
CLD 1A - 100/6	8	0	100	0
CLD 1A - 100/6	12	0	100	0
CLD 1A - 100/6	16	0	100	0
CLD 1A - 100/7	0	0	100	4	12.06
CLD 1A - 100/7	4	0	100	2	6.15
CLD 1A - 100/7	8	0	100	1	4.83
CLD 1A - 100/7	12	0	100	1	5.51
CLD 1A - 100/7	16	0	100	1	7.53
CLD 1A - 100/8	0	0	100	4	9.48
CLD 1A - 100/8	4	0	100	1	4.88
CLD 1A - 100/8	8	0	100	1	4.11
CLD 1A - 100/8	12	0	100	0
CLD 1A - 100/8	16	0	100	0
CLD 1A - 100/9	0	0	100	4	14.22
CLD 1A - 100/9	4	0	100	4	15.09
CLD 1A - 100/9	8	0	100	2	8.57
CLD 1A - 100/9	12	0	100	2	9.61
CLD 1A - 100/9	16	0	100	2	10.99
CLD 1A - 100/10	0	0	100	4	11.94
CLD 1A - 100/10	4	0	100	3	10.2
CLD 1A - 100/10	8	0	100	2	8.45
CLD 1A - 100/10	12	0	100	2	9.77
CLD 1A - 100/10	16	0	100	2	10.7
CLD 1B - 0/1	0	0	0	4	17.58
CLD 1B - 0/1	4	0	0	4	25.15
CLD 1B - 0/1	8	0	0	4	24.16
CLD 1B - 0/1	12	0	0	4	24.74
CLD 1B - 0/1	16	0	0	4	26.73
CLD 1B - 0/2	0	0	0	4	16.68
CLD 1B - 0/2	4	0	0	4	21.9
CLD 1B - 0/2	8	0	0	4	20.12
CLD 1B - 0/2	12	0	0	4	21.25
CLD 1B - 0/2	16	0	0	4	23.4
CLD 1B - 0/3	0	0	0	4	17.54
CLD 1B - 0/3	4	0	0	4	23.25
CLD 1B - 0/3	8	0	0	4	22.42
CLD 1B - 0/3	12	0	0	4	23.3
CLD 1B - 0/3	16	0	0	2	15.71
CLD 1B - 0/4	0	0	0	4	19.32
CLD 1B - 0/4	4	0	0	4	26.08
CLD 1B - 0/4	8	0	0	4	22.86
CLD 1B - 0/4	12	0	0	3	18.32
CLD 1B - 0/4	16	0	0	3	19.68
CLD 1B - 0/5	0	0	0	4	24.99
CLD 1B - 0/5	4	0	0	4	27.76
CLD 1B - 0/5	8	0	0	4	22.93
CLD 1B - 0/5	12	0	0	2	12.28
CLD 1B - 0/5	16	0	0	1	6.75
CLD 1B - 0/6	0	0	0	4	18.84
CLD 1B - 0/6	4	0	0	4	25.14
CLD 1B - 0/6	8	0	0	3	16.04
CLD 1B - 0/6	12	0	0	2	13.74
CLD 1B - 0/6	16	0	0	2	14.42
CLD 1B - 0/7	0	0	0	4	18.1
CLD 1B - 0/7	4	0	0	4	23.93
CLD 1B - 0/7	8	0	0	4	21.83
CLD 1B - 0/7	12	0	0	4	24.38
CLD 1B - 0/7	16	0	0	4	24.16
CLD 1B - 0/8	0	0	0	4	19.35
CLD 1B - 0/8	4	0	0	4	28
CLD 1B - 0/8	8	0	0	4	24.37
CLD 1B - 0/8	12	0	0	4	24.66
CLD 1B - 0/8	16	0	0	4	26.26
CLD 1B - 0/9	0	0	0	4	19.19
CLD 1B - 0/9	4	0	0	4	24.01
CLD 1B - 0/9	8	0	0	4	19.48
CLD 1B - 0/9	12	0	0	3	19.06
CLD 1B - 0/9	16	0	0	3	20.73
CLD 1B - 0/10	0	0	0	4	17.23
CLD 1B - 0/10	4	0	0	4	23.32
CLD 1B - 0/10	8	0	0	4	22.1
CLD 1B - 0/10	12	0	0	4	23.1
CLD 1B - 0/10	16	0	0	4	25.3
CLD 1B - 1/1	0	1	1	4	17.65
CLD 1B - 1/1	4	1	1	4	25.53
CLD 1B - 1/1	8	1	1	4	25.7
CLD 1B - 1/1	12	1	1	4	23.54
CLD 1B - 1/1	16	1	1	4	24.47
CLD 1B - 1/2	0	1	1	4	17.77
CLD 1B - 1/2	4	1	1	4	22.98
CLD 1B - 1/2	8	1	1	4	19.58
CLD 1B - 1/2	12	1	1	2	11.83
CLD 1B - 1/2	16	1	1	2	12.16
CLD 1B - 1/3	0	1	1	4	14.55
CLD 1B - 1/3	4	1	1	4	20.74
CLD 1B - 1/3	8	1	1	4	22.19
CLD 1B - 1/3	12	1	1	4	23.03
CLD 1B - 1/3	16	1	1	4	21.13
CLD 1B - 1/4	0	1	1	4	18.48
CLD 1B - 1/4	4	1	1	3	15.12
CLD 1B - 1/4	8	1	1	2	10.96
CLD 1B - 1/4	12	1	1	1	8.06
CLD 1B - 1/4	16	1	1	1	7.26
CLD 1B - 1/5	0	1	1	4	19.52
CLD 1B - 1/5	4	1	1	4	25.78
CLD 1B - 1/5	8	1	1	4	25.5
CLD 1B - 1/5	12	1	1	4	24.78
CLD 1B - 1/5	16	1	1	4	23.31
CLD 1B - 1/6	0	1	1	4	17.31
CLD 1B - 1/6	4	1	1	4	22.66
CLD 1B - 1/6	8	1	1	4	24.61
CLD 1B - 1/6	12	1	1	4	25.94
CLD 1B - 1/6	16	1	1	4	22.74
CLD 1B - 1/7	0	1	1	4	22.15
CLD 1B - 1/7	4	1	1	4	26.47
CLD 1B - 1/7	8	1	1	4	26.08
CLD 1B - 1/7	12	1	1	4	26.77
CLD 1B - 1/7	16	1	1	4	26.34
CLD 1B - 1/8	0	1	1	4	20.09
CLD 1B - 1/8	4	1	1	4	26.12
CLD 1B - 1/8	8	1	1	4	26.26
CLD 1B - 1/8	12	1	1	4	26.34
CLD 1B - 1/8	16	1	1	4	25.42
CLD 1B - 1/9	0	1	1	4	19.75
CLD 1B - 1/9	4	1	1	4	24.22
CLD 1B - 1/9	8	1	1	4	23.21
CLD 1B - 1/9	12	1	1	3	20.49
CLD 1B - 1/9	16	1	1	1	8.08
CLD 1B - 1/10	0	1	1	4	21.78
CLD 1B - 1/10	4	1	1	4	25.95
CLD 1B - 1/10	8	1	1	3	19.09
CLD 1B - 1/10	12	1	1	3	19.07
CLD 1B - 1/10	16	1	1	3	17.29
CLD 1B - 5/1	0	5	5	4	19.07
CLD 1B - 5/1	4	5	5	4	26.12
CLD 1B - 5/1	8	5	5	4	23.19
CLD 1B - 5/1	12	5	5	4	23.5
CLD 1B - 5/1	16	5	5	3	18.32
CLD 1B - 5/2	0	5	5	4	18.38
CLD 1B - 5/2	4	5	5	4	24.43
CLD 1B - 5/2	8	5	5	3	19
CLD 1B - 5/2	12	5	5	3	22.6
CLD 1B - 5/2	16	5	5	3	22.31
CLD 1B - 5/3	0	5	5	4	21.53
CLD 1B - 5/3	4	5	5	4	27.19
CLD 1B - 5/3	8	5	5	3	19.2
CLD 1B - 5/3	12	5	5	3	22.7
CLD 1B - 5/3	16	5	5	3	23.53
CLD 1B - 5/4	0	5	5	4	20.79
CLD 1B - 5/4	4	5	5	4	25.97
CLD 1B - 5/4	8	5	5	3	18.68
CLD 1B - 5/4	12	5	5	3	22.22
CLD 1B - 5/4	16	5	5	3	23.13
CLD 1B - 5/5	0	5	5	4	16.44
CLD 1B - 5/5	4	5	5	4	23.34
CLD 1B - 5/5	8	5	5	3	16.89
CLD 1B - 5/5	12	5	5	3	18.67
CLD 1B - 5/5	16	5	5	2	12.84
CLD 1B - 5/6	0	5	5	4	19.06
CLD 1B - 5/6	4	5	5	4	25.7
CLD 1B - 5/6	8	5	5	4	23.75
CLD 1B - 5/6	12	5	5	3	19.84
CLD 1B - 5/6	16	5	5	3	21.24
CLD 1B - 5/7	0	5	5	4	17.16
CLD 1B - 5/7	4	5	5	4	24.25
CLD 1B - 5/7	8	5	5	4	21.47
CLD 1B - 5/7	12	5	5	4	24.41
CLD 1B - 5/7	16	5	5	4	27.11
CLD 1B - 5/8	0	5	5	4	15.86
CLD 1B - 5/8	4	5	5	4	22.19
CLD 1B - 5/8	8	5	5	4	21.89
CLD 1B - 5/8	12	5	5	4	24.13
CLD 1B - 5/8	16	5	5	4	25.96
CLD 1B - 5/9	0	5	5	4	17.12
CLD 1B - 5/9	4	5	5	4	22.97
CLD 1B - 5/9	8	5	5	4	21.71
CLD 1B - 5/9	12	5	5	4	23.61
CLD 1B - 5/9	16	5	5	4	23.56
CLD 1B - 5/10	0	5	5	4	18.39
CLD 1B - 5/10	4	5	5	4	20.39
CLD 1B - 5/10	8	5	5	4	17.75
CLD 1B - 5/10	12	5	5	3	20.3
CLD 1B - 5/10	16	5	5	3	19.56
CLD 1B - 10/1	0	10	10	4	19.16
CLD 1B - 10/1	4	10	10	4	25.54
CLD 1B - 10/1	8	10	10	4	24.53
CLD 1B - 10/1	12	10	10	4	25.23
CLD 1B - 10/1	16	10	10	4	25.5
CLD 1B - 10/2	0	10	10	4	15.57
CLD 1B - 10/2	4	10	10	4	20.06
CLD 1B - 10/2	8	10	10	4	18.64
CLD 1B - 10/2	12	10	10	3	15.45
CLD 1B - 10/2	16	10	10	3	16.61
CLD 1B - 10/3	0	10	10	4	19.63
CLD 1B - 10/3	4	10	10	4	24.19
CLD 1B - 10/3	8	10	10	3	15.72
CLD 1B - 10/3	12	10	10	1	7.38
CLD 1B - 10/3	16	10	10	1	6.53
CLD 1B - 10/4	0	10	10	4	20.05
CLD 1B - 10/4	4	10	10	4	25.7
CLD 1B - 10/4	8	10	10	4	24.4
CLD 1B - 10/4	12	10	10	4	26.59
CLD 1B - 10/4	16	10	10	4	26.46
CLD 1B - 10/5	0	10	10	4	20.51
CLD 1B - 10/5	4	10	10	4	25.58
CLD 1B - 10/5	8	10	10	4	24.16
CLD 1B - 10/5	12	10	10	4	26.54
CLD 1B - 10/5	16	10	10	4	29.98
CLD 1B - 10/6	0	10	10	4	19.43
CLD 1B - 10/6	4	10	10	4	25.46
CLD 1B - 10/6	8	10	10	4	23.08
CLD 1B - 10/6	12	10	10	4	25.22
CLD 1B - 10/6	16	10	10	3	19.29
CLD 1B - 10/7	0	10	10	4	18.04
CLD 1B - 10/7	4	10	10	4	23.73
CLD 1B - 10/7	8	10	10	4	22.87
CLD 1B - 10/7	12	10	10	4	23.43
CLD 1B - 10/7	16	10	10	4	24
CLD 1B - 10/8	0	10	10	4	20.13
CLD 1B - 10/8	4	10	10	4	24.68
CLD 1B - 10/8	8	10	10	4	24.78
CLD 1B - 10/8	12	10	10	4	25.18
CLD 1B - 10/8	16	10	10	4	26.33
CLD 1B - 10/9	0	10	10	4	17.75
CLD 1B - 10/9	4	10	10	4	22.66
CLD 1B - 10/9	8	10	10	4	20.7
CLD 1B - 10/9	12	10	10	4	21.7
CLD 1B - 10/9	16	10	10	4	27.57
CLD 1B - 10/10	0	10	10	4	15.94
CLD 1B - 10/10	4	10	10	4	21.6
CLD 1B - 10/10	8	10	10	4	22.28
CLD 1B - 10/10	12	10	10	4	24.07
CLD 1B - 10/10	16	10	10	4	22.27
CLD 1B - 20/1	0	20	20	4	19.16
CLD 1B - 20/1	4	20	20	4	21.16
CLD 1B - 20/1	8	20	20	3	18.74
CLD 1B - 20/1	12	20	20	3	21.28
CLD 1B - 20/1	16	20	20	3	21.56
CLD 1B - 20/2	0	20	20	4	18.77
CLD 1B - 20/2	4	20	20	4	24.46
CLD 1B - 20/2	8	20	20	3	15.76
CLD 1B - 20/2	12	20	20	2	12.12
CLD 1B - 20/2	16	20	20	2	13.26
CLD 1B - 20/3	0	20	20	4	18.38
CLD 1B - 20/3	4	20	20	4	24.8
CLD 1B - 20/3	8	20	20	4	19.13
CLD 1B - 20/3	12	20	20	4	23.74
CLD 1B - 20/3	16	20	20	4	24.2
CLD 1B - 20/4	0	20	20	4	18.55
CLD 1B - 20/4	4	20	20	4	21.31
CLD 1B - 20/4	8	20	20	4	21.82
CLD 1B - 20/4	12	20	20	4	24.88
CLD 1B - 20/4	16	20	20	4	25.36
CLD 1B - 20/5	0	20	20	4	21.78
CLD 1B - 20/5	4	20	20	3	17.51
CLD 1B - 20/5	8	20	20	3	16.62
CLD 1B - 20/5	12	20	20	3	19.17
CLD 1B - 20/5	16	20	20	3	19.9
CLD 1B - 20/6	0	20	20	4	16.89
CLD 1B - 20/6	4	20	20	4	23.5
CLD 1B - 20/6	8	20	20	4	20.76
CLD 1B - 20/6	12	20	20	3	17.09
CLD 1B - 20/6	16	20	20	3	18.47
CLD 1B - 20/7	0	20	20	4	18.22
CLD 1B - 20/7	4	20	20	4	24.89
CLD 1B - 20/7	8	20	20	4	22.44
CLD 1B - 20/7	12	20	20	4	23.66
CLD 1B - 20/7	16	20	20	4	24.19
CLD 1B - 20/8	0	20	20	4	18.53
CLD 1B - 20/8	4	20	20	4	24.96
CLD 1B - 20/8	8	20	20	4	23.36
CLD 1B - 20/8	12	20	20	4	24.82
CLD 1B - 20/8	16	20	20	4	26
CLD 1B - 20/9	0	20	20	4	18.43
CLD 1B - 20/9	4	20	20	4	24.74
CLD 1B - 20/9	8	20	20	4	23
CLD 1B - 20/9	12	20	20	4	24.14
CLD 1B - 20/9	16	20	20	2	12.45
CLD 1B - 20/10	0	20	20	4	17.46
CLD 1B - 20/10	4	20	20	4	21.57
CLD 1B - 20/10	8	20	20	4	19.9
CLD 1B - 20/10	12	20	20	3	17.35
CLD 1B - 20/10	16	20	20	3	18.71
CLD 1B - 100/1	0	100	100	4	19.1
CLD 1B - 100/1	4	100	100	4	18.59
CLD 1B - 100/1	8	100	100	2	8.2
CLD 1B - 100/1	12	100	100	0
CLD 1B - 100/1	16	100	100	0
CLD 1B - 100/2	0	100	100	4	19.79
CLD 1B - 100/2	4	100	100	4	22.94
CLD 1B - 100/2	8	100	100	4	23.12
CLD 1B - 100/2	12	100	100	4	25.54
CLD 1B - 100/2	16	100	100	4	27.72
CLD 1B - 100/3	0	100	100	4	19.95
CLD 1B - 100/3	4	100	100	4	21.8
CLD 1B - 100/3	8	100	100	4	21.37
CLD 1B - 100/3	12	100	100	4	24.24
CLD 1B - 100/3	16	100	100	4	25.19
CLD 1B - 100/4	0	100	100	4	18.52
CLD 1B - 100/4	4	100	100	4	19.43
CLD 1B - 100/4	8	100	100	4	19.65
CLD 1B - 100/4	12	100	100	3	15.64
CLD 1B - 100/4	16	100	100	1	6.92
CLD 1B - 100/5	0	100	100	4	16.66
CLD 1B - 100/5	4	100	100	4	17.78
CLD 1B - 100/5	8	100	100	4	17.91
CLD 1B - 100/5	12	100	100	3	16.23
CLD 1B - 100/5	16	100	100	3	17.21
CLD 1B - 100/6	0	100	100	4	15.81
CLD 1B - 100/6	4	100	100	4	18.13
CLD 1B - 100/6	8	100	100	4	18.77
CLD 1B - 100/6	12	100	100	4	22
CLD 1B - 100/6	16	100	100	4	23.16
CLD 1B - 100/7	0	100	100	4	16.43
CLD 1B - 100/7	4	100	100	4	19.69
CLD 1B - 100/7	8	100	100	4	19.3
CLD 1B - 100/7	12	100	100	4	23.51
CLD 1B - 100/7	16	100	100	4	25.03
CLD 1B - 100/8	0	100	100	4	19.63
CLD 1B - 100/8	4	100	100	4	21.63
CLD 1B - 100/8	8	100	100	4	22.43
CLD 1B - 100/8	12	100	100	4	24.32
CLD 1B - 100/8	16	100	100	4	26.05
CLD 1B - 100/9	0	100	100	4	15.08
CLD 1B - 100/9	4	100	100	4	16.52
CLD 1B - 100/9	8	100	100	4	16.25
CLD 1B - 100/9	12	100	100	2	10.84
CLD 1B - 100/9	16	100	100	2	10.02
CLD 1B - 100/10	0	100	100	4	17.46
CLD 1B - 100/10	4	100	100	4	19.8
CLD 1B - 100/10	8	100	100	4	20.77
CLD 1B - 100/10	12	100	100	4	24.07
CLD 1B - 100/10	16	100	100	4	23.19
CLD 1C - 0/1	0	0	0	4	16.96
CLD 1C - 0/1	4	0	0	4	23.56
CLD 1C - 0/1	8	0	0	4	16.58
CLD 1C - 0/1	12	0	0	3	16.03
CLD 1C - 0/1	16	0	0	3	16.83
CLD 1C - 0/2	0	0	0	4	20.32
CLD 1C - 0/2	4	0	0	4	24.5
CLD 1C - 0/2	8	0	0	4	22.79
CLD 1C - 0/2	12	0	0	4	24.24
CLD 1C - 0/2	16	0	0	4	27.19
CLD 1C - 0/3	0	0	0	4	20.11
CLD 1C - 0/3	4	0	0	4	26.33
CLD 1C - 0/3	8	0	0	4	24.46
CLD 1C - 0/3	12	0	0	4	27.67
CLD 1C - 0/3	16	0	0	4	29.09
CLD 1C - 0/4	0	0	0	4	21.33
CLD 1C - 0/4	4	0	0	4	24.88
CLD 1C - 0/4	8	0	0	4	23.4
CLD 1C - 0/4	12	0	0	4	24.88
CLD 1C - 0/4	16	0	0	4	26.68
CLD 1C - 0/5	0	0	0	4	18.48
CLD 1C - 0/5	4	0	0	4	26.32
CLD 1C - 0/5	8	0	0	4	24.19
CLD 1C - 0/5	12	0	0	4	24.74
CLD 1C - 0/5	16	0	0	4	23
CLD 1C - 0/6	0	0	0	4	18.56
CLD 1C - 0/6	4	0	0	4	23.58
CLD 1C - 0/6	8	0	0	4	22.3
CLD 1C - 0/6	12	0	0	4	26.45
CLD 1C - 0/6	16	0	0	4	29
CLD 1C - 0/7	0	0	0	4	20.73
CLD 1C - 0/7	4	0	0	4	26.03
CLD 1C - 0/7	8	0	0	4	24.27
CLD 1C - 0/7	12	0	0	4	24.55
CLD 1C - 0/7	16	0	0	3	22.18
CLD 1C - 0/8	0	0	0	4	18.38
CLD 1C - 0/8	4	0	0	4	24.52
CLD 1C - 0/8	8	0	0	4	22.68
CLD 1C - 0/8	12	0	0	4	24.34
CLD 1C - 0/8	16	0	0	4	28.46
CLD 1C - 0/9	0	0	0	4	19.58
CLD 1C - 0/9	4	0	0	4	26.41
CLD 1C - 0/9	8	0	0	4	24.49
CLD 1C - 0/9	12	0	0	4	25.63
CLD 1C - 0/9	16	0	0	4	27.96
CLD 1C - 0/10	0	0	0	4	17.35
CLD 1C - 0/10	4	0	0	3	17.58
CLD 1C - 0/10	8	0	0	2	12.25
CLD 1C - 0/10	12	0	0	1	8.36
CLD 1C - 0/10	16	0	0	1	9.85
CLD 1C - 1/1	0	1	0	4	17.73
CLD 1C - 1/1	4	1	0	4	24.68
CLD 1C - 1/1	8	1	0	4	23.11
CLD 1C - 1/1	12	1	0	4	24.81
CLD 1C - 1/1	16	1	0	4	24.18
CLD 1C - 1/2	0	1	0	4	17.41
CLD 1C - 1/2	4	1	0	4	23.77
CLD 1C - 1/2	8	1	0	4	21.67
CLD 1C - 1/2	12	1	0	4	24.21
CLD 1C - 1/2	16	1	0	4	23.11
CLD 1C - 1/3	0	1	0	4	18.66
CLD 1C - 1/3	4	1	0	4	23.98
CLD 1C - 1/3	8	1	0	4	23.5
CLD 1C - 1/3	12	1	0	4	26.58
CLD 1C - 1/3	16	1	0	4	26.09
CLD 1C - 1/4	0	1	0	4	17.17
CLD 1C - 1/4	4	1	0	4	22.59
CLD 1C - 1/4	8	1	0	3	13.17
CLD 1C - 1/4	12	1	0	2	11.56
CLD 1C - 1/4	16	1	0	2	11.16
CLD 1C - 1/5	0	1	0	4	19.11
CLD 1C - 1/5	4	1	0	4	25.35
CLD 1C - 1/5	8	1	0	3	14.78
CLD 1C - 1/5	12	1	0	3	19.59
CLD 1C - 1/5	16	1	0	3	20.9
CLD 1C - 1/6	0	1	0	4	16.44
CLD 1C - 1/6	4	1	0	4	22.22
CLD 1C - 1/6	8	1	0	4	20.79
CLD 1C - 1/6	12	1	0	4	24.38
CLD 1C - 1/6	16	1	0	4	23.05
CLD 1C - 1/7	0	1	0	4	19.86
CLD 1C - 1/7	4	1	0	4	25.14
CLD 1C - 1/7	8	1	0	4	23.73
CLD 1C - 1/7	12	1	0	4	25.59
CLD 1C - 1/7	16	1	0	4	25.22
CLD 1C - 1/8	0	1	0	4	21.88
CLD 1C - 1/8	4	1	0	4	25.44
CLD 1C - 1/8	8	1	0	4	23.19
CLD 1C - 1/8	12	1	0	4	27.5
CLD 1C - 1/8	16	1	0	4	27.09
CLD 1C - 1/9	0	1	0	4	19.71
CLD 1C - 1/9	4	1	0	4	27.36
CLD 1C - 1/9	8	1	0	4	25.11
CLD 1C - 1/9	12	1	0	4	27.38
CLD 1C - 1/9	16	1	0	4	26.65
CLD 1C - 1/10	0	1	0	4	17.75
CLD 1C - 1/10	4	1	0	4	23.61
CLD 1C - 1/10	8	1	0	4	19.89
CLD 1C - 1/10	12	1	0	3	19.67
CLD 1C - 1/10	16	1	0	3	18.48
CLD 1C - 5/1	0	5	0	4	14.61
CLD 1C - 5/1	4	5	0	4	20.13
CLD 1C - 5/1	8	5	0	4	19.33
CLD 1C - 5/1	12	5	0	4	21.71
CLD 1C - 5/1	16	5	0	4	20.3
CLD 1C - 5/2	0	5	0	4	19.97
CLD 1C - 5/2	4	5	0	4	25.81
CLD 1C - 5/2	8	5	0	4	26.49
CLD 1C - 5/2	12	5	0	4	26.83
CLD 1C - 5/2	16	5	0	4	29.23
CLD 1C - 5/3	0	5	0	4	17.59
CLD 1C - 5/3	4	5	0	4	24.2
CLD 1C - 5/3	8	5	0	4	23.13
CLD 1C - 5/3	12	5	0	3	21.41
CLD 1C - 5/3	16	5	0	3	23.59
CLD 1C - 5/4	0	5	0	4	18.33
CLD 1C - 5/4	4	5	0	4	24.04
CLD 1C - 5/4	8	5	0	3	17.68
CLD 1C - 5/4	12	5	0	3	21.43
CLD 1C - 5/4	16	5	0	3	20.69
CLD 1C - 5/5	0	5	0	4	20.89
CLD 1C - 5/5	4	5	0	4	25.84
CLD 1C - 5/5	8	5	0	4	23.71
CLD 1C - 5/5	12	5	0	4	27.9
CLD 1C - 5/5	16	5	0	4	27.13
CLD 1C - 5/6	0	5	0	4	20.55
CLD 1C - 5/6	4	5	0	4	26.02
CLD 1C - 5/6	8	5	0	4	24.15
CLD 1C - 5/6	12	5	0	3	23.22
CLD 1C - 5/6	16	5	0	3	23.14
CLD 1C - 5/7	0	5	0	4	18.5
CLD 1C - 5/7	4	5	0	4	25.09
CLD 1C - 5/7	8	5	0	4	24.17
CLD 1C - 5/7	12	5	0	4	28.12
CLD 1C - 5/7	16	5	0	4	29.34
CLD 1C - 5/8	0	5	0	4	19.21
CLD 1C - 5/8	4	5	0	4	25.02
CLD 1C - 5/8	8	5	0	4	24.15
CLD 1C - 5/8	12	5	0	4	27.84
CLD 1C - 5/8	16	5	0	4	28.5
CLD 1C - 5/9	0	5	0	4	16.7
CLD 1C - 5/9	4	5	0	4	23.07
CLD 1C - 5/9	8	5	0	4	21.32
CLD 1C - 5/9	12	5	0	4	24.4
CLD 1C - 5/9	16	5	0	3	17.5
CLD 1C - 5/10	0	5	0	4	20.99
CLD 1C - 5/10	4	5	0	4	25.63
CLD 1C - 5/10	8	5	0	4	24.8
CLD 1C - 5/10	12	5	0	4	28.55
CLD 1C - 5/10	16	5	0	4	30.49
CLD 1C - 10/1	0	10	0	4	20.21
CLD 1C - 10/1	4	10	0	4	24.79
CLD 1C - 10/1	8	10	0	4	24.74
CLD 1C - 10/1	12	10	0	4	26.08
CLD 1C - 10/1	16	10	0	4	29.49
CLD 1C - 10/2	0	10	0	4	18.66
CLD 1C - 10/2	4	10	0	4	23.72
CLD 1C - 10/2	8	10	0	3	18.02
CLD 1C - 10/2	12	10	0	1	7.17
CLD 1C - 10/2	16	10	0	1	7.99
CLD 1C - 10/3	0	10	0	4	16.17
CLD 1C - 10/3	4	10	0	4	22.17
CLD 1C - 10/3	8	10	0	4	20.39
CLD 1C - 10/3	12	10	0	4	23.43
CLD 1C - 10/3	16	10	0	4	24.21
CLD 1C - 10/4	0	10	0	4	18.09
CLD 1C - 10/4	4	10	0	4	22.78
CLD 1C - 10/4	8	10	0	4	22.35
CLD 1C - 10/4	12	10	0	4	26.09
CLD 1C - 10/4	16	10	0	4	25.7
CLD 1C - 10/5	0	10	0	4	18.02
CLD 1C - 10/5	4	10	0	4	23.68
CLD 1C - 10/5	8	10	0	4	22.83
CLD 1C - 10/5	12	10	0	4	24.59
CLD 1C - 10/5	16	10	0	4	24.4
CLD 1C - 10/6	0	10	0	4	17.37
CLD 1C - 10/6	4	10	0	4	22.49
CLD 1C - 10/6	8	10	0	4	21.56
CLD 1C - 10/6	12	10	0	4	25.9
CLD 1C - 10/6	16	10	0	3	18.73
CLD 1C - 10/7	0	10	0	4	18.3
CLD 1C - 10/7	4	10	0	4	23.06
CLD 1C - 10/7	8	10	0	4	21.28
CLD 1C - 10/7	12	10	0	4	22.93
CLD 1C - 10/7	16	10	0	4	25.14
CLD 1C - 10/8	0	10	0	4	15.58
CLD 1C - 10/8	4	10	0	4	20.48
CLD 1C - 10/8	8	10	0	4	20.34
CLD 1C - 10/8	12	10	0	4	23.4
CLD 1C - 10/8	16	10	0	4	22.21
CLD 1C - 10/9	0	10	0	4	18.55
CLD 1C - 10/9	4	10	0	4	23.3
CLD 1C - 10/9	8	10	0	4	23.26
CLD 1C - 10/9	12	10	0	4	26.73
CLD 1C - 10/9	16	10	0	4	24.83
CLD 1C - 10/10	0	10	0	4	16.98
CLD 1C - 10/10	4	10	0	4	19.89
CLD 1C - 10/10	8	10	0	2	11.86
CLD 1C - 10/10	12	10	0	2	15.16
CLD 1C - 10/10	16	10	0	2	14.81
CLD 1C - 20/1	0	20	0	4	18.25
CLD 1C - 20/1	4	20	0	4	22.18
CLD 1C - 20/1	8	20	0	3	15.81
CLD 1C - 20/1	12	20	0	3	18.52
CLD 1C - 20/1	16	20	0	3	19.65
CLD 1C - 20/2	0	20	0	4	17.26
CLD 1C - 20/2	4	20	0	4	22.64
CLD 1C - 20/2	8	20	0	4	20.49
CLD 1C - 20/2	12	20	0	4	24.3
CLD 1C - 20/2	16	20	0	4	22.66
CLD 1C - 20/3	0	20	0	4	17.31
CLD 1C - 20/3	4	20	0	4	21.39
CLD 1C - 20/3	8	20	0	4	20.36
CLD 1C - 20/3	12	20	0	4	23.95
CLD 1C - 20/3	16	20	0	3	22.27
CLD 1C - 20/4	0	20	0	4	16.76
CLD 1C - 20/4	4	20	0	3	15.34
CLD 1C - 20/4	8	20	0	2	10.02
CLD 1C - 20/4	12	20	0	2	9.94
CLD 1C - 20/4	16	20	0	0
CLD 1C - 20/5	0	20	0	4	15.04
CLD 1C - 20/5	4	20	0	4	14.42
CLD 1C - 20/5	8	20	0	0
CLD 1C - 20/5	12	20	0	0
CLD 1C - 20/5	16	20	0	0
CLD 1C - 20/6	0	20	0	4	17.1
CLD 1C - 20/6	4	20	0	4	22.52
CLD 1C - 20/6	8	20	0	4	21.25
CLD 1C - 20/6	12	20	0	4	26.02
CLD 1C - 20/6	16	20	0	4	21.55
CLD 1C - 20/7	0	20	0	4	17.06
CLD 1C - 20/7	4	20	0	4	21.63
CLD 1C - 20/7	8	20	0	4	22.36
CLD 1C - 20/7	12	20	0	3	20.12
CLD 1C - 20/7	16	20	0	3	19.62
CLD 1C - 20/8	0	20	0	4	17.77
CLD 1C - 20/8	4	20	0	4	21.14
CLD 1C - 20/8	8	20	0	3	17.83
CLD 1C - 20/8	12	20	0	3	22.24
CLD 1C - 20/8	16	20	0	3	24.16
CLD 1C - 20/9	0	20	0	4	21.06
CLD 1C - 20/9	4	20	0	4	27.01
CLD 1C - 20/9	8	20	0	4	24.99
CLD 1C - 20/9	12	20	0	4	29.83
CLD 1C - 20/9	16	20	0	4	27.82
CLD 1C - 20/10	0	20	0	4	19.18
CLD 1C - 20/10	4	20	0	4	24.46
CLD 1C - 20/10	8	20	0	4	24.75
CLD 1C - 20/10	12	20	0	4	28.13
CLD 1C - 20/10	16	20	0	4	27.64
CLD 1C - 100/1	0	100	0	4	21.02
CLD 1C - 100/1	4	100	0	4	25.58
CLD 1C - 100/1	8	100	0	4	23.47
CLD 1C - 100/1	12	100	0	3	19.54
CLD 1C - 100/1	16	100	0	3	20.57
CLD 1C - 100/2	0	100	0	4	17.7
CLD 1C - 100/2	4	100	0	4	19.74
CLD 1C - 100/2	8	100	0	4	19.69
CLD 1C - 100/2	12	100	0	3	20.13
CLD 1C - 100/2	16	100	0	3	21.16
CLD 1C - 100/3	0	100	0	4	21.84
CLD 1C - 100/3	4	100	0	4	24.75
CLD 1C - 100/3	8	100	0	3	16.31
CLD 1C - 100/3	12	100	0	3	19.29
CLD 1C - 100/3	16	100	0	1	7.05
CLD 1C - 100/4	0	100	0	4	19.32
CLD 1C - 100/4	4	100	0	4	20.84
CLD 1C - 100/4	8	100	0	4	19.33
CLD 1C - 100/4	12	100	0	4	22.56
CLD 1C - 100/4	16	100	0	4	21.07
CLD 1C - 100/5	0	100	0	4	18.33
CLD 1C - 100/5	4	100	0	4	23.34
CLD 1C - 100/5	8	100	0	4	20.65
CLD 1C - 100/5	12	100	0	3	18.33
CLD 1C - 100/5	16	100	0	3	18.73
CLD 1C - 100/6	0	100	0	4	18.27
CLD 1C - 100/6	4	100	0	4	20.98
CLD 1C - 100/6	8	100	0	4	20.41
CLD 1C - 100/6	12	100	0	3	16.58
CLD 1C - 100/6	16	100	0	3	17.21
CLD 1C - 100/7	0	100	0	4	18.15
CLD 1C - 100/7	4	100	0	4	19.54
CLD 1C - 100/7	8	100	0	4	19.58
CLD 1C - 100/7	12	100	0	4	24.05
CLD 1C - 100/7	16	100	0	4	25.06
CLD 1C - 100/8	0	100	0	4	22.59
CLD 1C - 100/8	4	100	0	4	25.69
CLD 1C - 100/8	8	100	0	3	17.36
CLD 1C - 100/8	12	100	0	2	11.8
CLD 1C - 100/8	16	100	0	2	12.3
CLD 1C - 100/9	0	100	0	4	16.64
CLD 1C - 100/9	4	100	0	4	21.76
CLD 1C - 100/9	8	100	0	4	20.86
CLD 1C - 100/9	12	100	0	4	25.37
CLD 1C - 100/9	16	100	0	4	25.38
CLD 1C - 100/10	0	100	0	4	14.55
CLD 1C - 100/10	4	100	0	4	17.55
CLD 1C - 100/10	8	100	0	4	17.25
CLD 1C - 100/10	12	100	0	4	20.77
CLD 1C - 100/10	16	100	0	4	21.13

## Sheet: Food (g)
Bottle iD	Time	Food treated (ppb)	Soil treated (ppb)	No Worms	Food consumed (g)
CLD 1A - 0/1	0	0	0	4	0
CLD 1A - 0/1	4	0	0	4	33		GROUP A
CLD 1A - 0/1	8	0	0	4	57		Food consumed (g)	Week 4	Week 8	Week 12	Week 16
CLD 1A - 0/1	12	0	0	2	59		Control	10.2583	15.983	24.9	20
CLD 1A - 0/1	16	0	0	2	35		1ppb	14.7407	19.3796	23.7083	23.8958
CLD 1A - 0/2	0	0	0	4	0		5ppb	12.4537	22.75	21.6458	22.8125
CLD 1A - 0/2	4	0	0	4	34		10ppb	13.675	17.4074	26.0208	22.7917
CLD 1A - 0/2	8	0	0	3	52		20ppb	19.4792	19	32.15	26.8667
CLD 1A - 0/2	12	0	0	2	48		100ppb	13.9833	15.2778	23.7083	17.0278
CLD 1A - 0/2	16	0	0	2	29
CLD 1A - 0/3	0	0	0	4	0
CLD 1A - 0/3	4	0	0	3	31		GROUP B
CLD 1A - 0/3	8	0	0	2	38		Food consumed (g)	Week 4	Week 8	Week 12	Week 16
CLD 1A - 0/3	12	0	0	1	33		Control	13.1	15.2667	19.8833	19.956
CLD 1A - 0/3	16	0	0	1	16		1ppb	15.1833	18.6167	24.2083	23.8917
CLD 1A - 0/4	0	0	0	4	0		5ppb	13.575	18.4667	20.5917	20.4417
CLD 1A - 0/4	4	0	0	4	37		10ppb	14.375	15.95	17.8333	18.25
CLD 1A - 0/4	8	0	0	4	51		20ppb	13.85	16.3917	20.0417	22.75
CLD 1A - 0/4	12	0	0	4	54		100ppb	2.725	10.575	16.5648	17.4815
CLD 1A - 0/4	16	0	0	4	62
CLD 1A - 0/5	0	0	0	4	0		GROUP C
CLD 1A - 0/5	4	0	0	4	40		Food consumed (g)	Week 4	Week 8	Week 12	Week 16
CLD 1A - 0/5	8	0	0	3	56		Control	12.3833	16.175	17.4	18.9417
CLD 1A - 0/5	12	0	0	2	58		1ppb	13.5	16.7917	18.7667	17.9917
CLD 1A - 0/5	16	0	0	2	63		5ppb	14.225	15.5167	18.6083	19.3583
CLD 1A - 0/6	0	0	0	4	0		10ppb	12.475	16.1417	20.875	20.375
CLD 1A - 0/6	4	0	0	4	41		20ppb	11.3	16.0185	18.1852	19.375
CLD 1A - 0/6	8	0	0	4	54		100ppb	4.225	14.3417	19.2417	19.55
CLD 1A - 0/6	12	0	0	3	54
CLD 1A - 0/6	16	0	0	2	40
CLD 1A - 0/7	0	0	0	4	0
CLD 1A - 0/7	4	0	0	4	47
CLD 1A - 0/7	8	0	0	4	64
CLD 1A - 0/7	12	0	0	2	66
CLD 1A - 0/7	16	0	0	2	54
CLD 1A - 0/8	0	0	0	4	0
CLD 1A - 0/8	4	0	0	4	42
CLD 1A - 0/8	8	0	0	4	57
CLD 1A - 0/8	12	0	0	3	59
CLD 1A - 0/8	16	0	0	3	57
CLD 1A - 0/9	0	0	0	4	0
CLD 1A - 0/9	4	0	0	4	55
CLD 1A - 0/9	8	0	0	3	61
CLD 1A - 0/9	12	0	0	3	67
CLD 1A - 0/9	16	0	0	3	57
CLD 1A - 0/10	0	0	0	4	0
CLD 1A - 0/10	4	0	0	4	40
CLD 1A - 0/10	8	0	0	4	55
CLD 1A - 0/10	12	0	0	2	54
CLD 1A - 0/10	16	0	0	0
CLD 1A - 1/1	0	0	1	4	0
CLD 1A - 1/1	4	0	1	4	41
CLD 1A - 1/1	8	0	1	3	57
CLD 1A - 1/1	12	0	1	3	55
CLD 1A - 1/1	16	0	1	3	43
CLD 1A - 1/2	0	0	1	4	0
CLD 1A - 1/2	4	0	1	4	46
CLD 1A - 1/2	8	0	1	4	61
CLD 1A - 1/2	12	0	1	4	64
CLD 1A - 1/2	16	0	1	4	68
CLD 1A - 1/3	0	0	1	4	0
CLD 1A - 1/3	4	0	1	3	36
CLD 1A - 1/3	8	0	1	1	36
CLD 1A - 1/3	12	0	1	1	50
CLD 1A - 1/3	16	0	1	1	39
CLD 1A - 1/4	0	0	1	4	0
CLD 1A - 1/4	4	0	1	3	46
CLD 1A - 1/4	8	0	1	3	58
CLD 1A - 1/4	12	0	1	3	66
CLD 1A - 1/4	16	0	1	3	70
CLD 1A - 1/5	0	0	1	4	0
CLD 1A - 1/5	4	0	1	2	37
CLD 1A - 1/5	8	0	1	2	24
CLD 1A - 1/5	12	0	1	2	26
CLD 1A - 1/5	16	0	1	2	33
CLD 1A - 1/6	0	0	1	4	29
CLD 1A - 1/6	4	0	1	0	0
CLD 1A - 1/6	8	0	1	0	0
CLD 1A - 1/6	12	0	1	0	0
CLD 1A - 1/6	16	0	1	0	0
CLD 1A - 1/7	0	0	1	4	0
CLD 1A - 1/7	4	0	1	1	35
CLD 1A - 1/7	8	0	1	1	13
CLD 1A - 1/7	12	0	1	0	0
CLD 1A - 1/7	16	0	1	0	0
CLD 1A - 1/8	0	0	1	4	0
CLD 1A - 1/8	4	0	1	3	40
CLD 1A - 1/8	8	0	1	3	52
CLD 1A - 1/8	12	0	1	3	52
CLD 1A - 1/8	16	0	1	3	63
CLD 1A - 1/9	0	0	1	4	0
CLD 1A - 1/9	4	0	1	4	33
CLD 1A - 1/9	8	0	1	2	39
CLD 1A - 1/9	12	0	1	2	44
CLD 1A - 1/9	16	0	1	2	62
CLD 1A - 1/10	0	0	1	4	0
CLD 1A - 1/10	4	0	1	4	34
CLD 1A - 1/10	8	0	1	2	46
CLD 1A - 1/10	12	0	1	1	31
CLD 1A - 1/10	16	0	1	1	29
CLD 1A - 5/1	0	0	5	4	0
CLD 1A - 5/1	4	0	5	3	36
CLD 1A - 5/1	8	0	5	3	47
CLD 1A - 5/1	12	0	5	3	50
CLD 1A - 5/1	16	0	5	2	58
CLD 1A - 5/2	0	0	5	4	0
CLD 1A - 5/2	4	0	5	4	41
CLD 1A - 5/2	8	0	5	3	55
CLD 1A - 5/2	12	0	5	1	50
CLD 1A - 5/2	16	0	5	1	24
CLD 1A - 5/3	0	0	5	4	0
CLD 1A - 5/3	4	0	5	4	28
CLD 1A - 5/3	8	0	5	3	53
CLD 1A - 5/3	12	0	5	2	24
CLD 1A - 5/3	16	0	5	2	41
CLD 1A - 5/4	0	0	5	4	0
CLD 1A - 5/4	4	0	5	2	35
CLD 1A - 5/4	8	0	5	1	38
CLD 1A - 5/4	12	0	5	1	25
CLD 1A - 5/4	16	0	5	1	16
CLD 1A - 5/5	0	0	5	4	0
CLD 1A - 5/5	4	0	5	2	31
CLD 1A - 5/5	8	0	5	0	18
CLD 1A - 5/5	12	0	5	0	0
CLD 1A - 5/5	16	0	5	0	0
CLD 1A - 5/6	0	0	5	4	0
CLD 1A - 5/6	4	0	5	3	44
CLD 1A - 5/6	8	0	5	3	46
CLD 1A - 5/6	12	0	5	2	47
CLD 1A - 5/6	16	0	5	2	63
CLD 1A - 5/7	0	0	5	4	0
CLD 1A - 5/7	4	0	5	2	25
CLD 1A - 5/7	8	0	5	1	25
CLD 1A - 5/7	12	0	5	1	16
CLD 1A - 5/7	16	0	5	1	17
CLD 1A - 5/8	0	0	5	4	0
CLD 1A - 5/8	4	0	5	0	35
CLD 1A - 5/8	8	0	5	0	0
CLD 1A - 5/8	12	0	5	0	0
CLD 1A - 5/8	16	0	5	0	0
CLD 1A - 5/9	0	0	5	4	0
CLD 1A - 5/9	4	0	5	3	33
CLD 1A - 5/9	8	0	5	2	50
CLD 1A - 5/9	12	0	5	2	36
CLD 1A - 5/9	16	0	5	2	55
CLD 1A - 5/10	0	0	5	4	0
CLD 1A - 5/10	4	0	5	3	35
CLD 1A - 5/10	8	0	5	1	27
CLD 1A - 5/10	12	0	5	1	12
CLD 1A - 5/10	16	0	5	1	17
CLD 1A - 10/1	0	0	10	4	0
CLD 1A - 10/1	4	0	10	4	43
CLD 1A - 10/1	8	0	10	3	53
CLD 1A - 10/1	12	0	10	3	53
CLD 1A - 10/1	16	0	10	3	59
CLD 1A - 10/2	0	0	10	4	0
CLD 1A - 10/2	4	0	10	4	45
CLD 1A - 10/2	8	0	10	4	62
CLD 1A - 10/2	12	0	10	3	67
CLD 1A - 10/2	16	0	10	3	62
CLD 1A - 10/3	0	0	10	4	0
CLD 1A - 10/3	4	0	10	3	41
CLD 1A - 10/3	8	0	10	3	37
CLD 1A - 10/3	12	0	10	2	46
CLD 1A - 10/3	16	0	10	2	62
CLD 1A - 10/4	0	0	10	4	0
CLD 1A - 10/4	4	0	10	3	40
CLD 1A - 10/4	8	0	10	3	31
CLD 1A - 10/4	12	0	10	1	49
CLD 1A - 10/4	16	0	10	1	25
CLD 1A - 10/5	0	0	10	0	0
CLD 1A - 10/5	4	0	10	0	45
CLD 1A - 10/5	8	0	10	3	58
CLD 1A - 10/5	12	0	10	2	63
CLD 1A - 10/5	16	0	10	2	66
CLD 1A - 10/6	0	0	10	4	0
CLD 1A - 10/6	4	0	10	1	32
CLD 1A - 10/6	8	0	10	0	10
CLD 1A - 10/6	12	0	10	0	0
CLD 1A - 10/6	16	0	10	0	0
CLD 1A - 10/7	0	0	10	4	0
CLD 1A - 10/7	4	0	10	4	43
CLD 1A - 10/7	8	0	10	1	36
CLD 1A - 10/7	12	0	10	0	0
CLD 1A - 10/7	16	0	10	0	0
CLD 1A - 10/8	0	0	10	4	0
CLD 1A - 10/8	4	0	10	4	41
CLD 1A - 10/8	8	0	10	4	52
CLD 1A - 10/8	12	0	10	3	65
CLD 1A - 10/8	16	0	10	3	56
CLD 1A - 10/9	0	0	10	4	0
CLD 1A - 10/9	4	0	10	4	40
CLD 1A - 10/9	8	0	10	3	54
CLD 1A - 10/9	12	0	10	3	69
CLD 1A - 10/9	16	0	10	3	39
CLD 1A - 10/10	0	0	10	4	0
CLD 1A - 10/10	4	0	10	4	39
CLD 1A - 10/10	8	0	10	4	58
CLD 1A - 10/10	12	0	10	3	60
CLD 1A - 10/10	16	0	10	3	64
CLD 1A - 20/1	0	0	20	4	0
CLD 1A - 20/1	4	0	20	3	39
CLD 1A - 20/1	8	0	20	2	44
CLD 1A - 20/1	12	0	20	2	57
CLD 1A - 20/1	16	0	20	2	58
CLD 1A - 20/2	0	0	20	4	0
CLD 1A - 20/2	4	0	20	1	38
CLD 1A - 20/2	8	0	20	1	34
CLD 1A - 20/2	12	0	20	1	53
CLD 1A - 20/2	16	0	20	1	41
CLD 1A - 20/3	0	0	20	4	0
CLD 1A - 20/3	4	0	20	4	50
CLD 1A - 20/3	8	0	20	4	66
CLD 1A - 20/3	12	0	20	4	57
CLD 1A - 20/3	16	0	20	3	58
CLD 1A - 20/4	0	0	20	4	0
CLD 1A - 20/4	4	0	20	2	33
CLD 1A - 20/4	8	0	20	2	33
CLD 1A - 20/4	12	0	20	1	50
CLD 1A - 20/4	16	0	20	1	32
CLD 1A - 20/5	0	0	20	4	0
CLD 1A - 20/5	4	0	20	0	35
CLD 1A - 20/5	8	0	20	0	0
CLD 1A - 20/5	12	0	20	0	0
CLD 1A - 20/5	16	0	20	0	0
CLD 1A - 20/6	0	0	20	4	0
CLD 1A - 20/6	4	0	20	4	46
CLD 1A - 20/6	8	0	20	0	19
CLD 1A - 20/6	12	0	20	0	0
CLD 1A - 20/6	16	0	20	0	0
CLD 1A - 20/7	0	0	20	4	0
CLD 1A - 20/7	4	0	20	0	45
CLD 1A - 20/7	8	0	20	0	12
CLD 1A - 20/7	12	0	20	0	15
CLD 1A - 20/7	16	0	20	0	0
CLD 1A - 20/8	0	0	20	0	0
CLD 1A - 20/8	4	0	20	3	37
CLD 1A - 20/8	8	0	20	2	11
CLD 1A - 20/8	12	0	20	1	0
CLD 1A - 20/8	16	0	20	1	13
CLD 1A - 20/9	0	0	20	4	0
CLD 1A - 20/9	4	0	20	3	37
CLD 1A - 20/9	8	0	20	0	8
CLD 1A - 20/9	12	0	20	0	0
CLD 1A - 20/9	16	0	20	0	0
CLD 1A - 20/10	0	0	20	4	0
CLD 1A - 20/10	4	0	20	1	37
CLD 1A - 20/10	8	0	20	0	8
CLD 1A - 20/10	12	0	20	0	0
CLD 1A - 20/10	16	0	20	0
CLD 1A - 100/1	0	0	100	4	0
CLD 1A - 100/1	4	0	100	4	30
CLD 1A - 100/1	8	0	100	1	13
CLD 1A - 100/1	12	0	100	0	0
CLD 1A - 100/1	16	0	100	0	0
CLD 1A - 100/2	0	0	100	4	0
CLD 1A - 100/2	4	0	100	3	34
CLD 1A - 100/2	8	0	100	3	24
CLD 1A - 100/2	12	0	100	0	0
CLD 1A - 100/2	16	0	100	0
CLD 1A - 100/3	0	0	100	4	0
CLD 1A - 100/3	4	0	100	2	33
CLD 1A - 100/3	8	0	100	1	24
CLD 1A - 100/3	12	0	100	1	22
CLD 1A - 100/3	16	0	100	1	18
CLD 1A - 100/4	0	0	100	4	0
CLD 1A - 100/4	4	0	100	4	39
CLD 1A - 100/4	8	0	100	4	52
CLD 1A - 100/4	12	0	100	4	51
CLD 1A - 100/4	16	0	100	3	44
CLD 1A - 100/5	0	0	100	4	0
CLD 1A - 100/5	4	0	100	4	35
CLD 1A - 100/5	8	0	100	2	45
CLD 1A - 100/5	12	0	100	2	52
CLD 1A - 100/5	16	0	100	2	53
CLD 1A - 100/6	0	0	100	4	0
CLD 1A - 100/6	4	0	100	1	25
CLD 1A - 100/6	8	0	100	0	4
CLD 1A - 100/6	12	0	100	0	0
CLD 1A - 100/6	16	0	100	0	0
CLD 1A - 100/7	0	0	100	4	0
CLD 1A - 100/7	4	0	100	2	26
CLD 1A - 100/7	8	0	100	1	14
CLD 1A - 100/7	12	0	100	1	27
CLD 1A - 100/7	16	0	100	1	9
CLD 1A - 100/8	0	0	100	4	0
CLD 1A - 100/8	4	0	100	1	29
CLD 1A - 100/8	8	0	100	1	14
CLD 1A - 100/8	12	0	100	0	0
CLD 1A - 100/8	16	0	100	0	0
CLD 1A - 100/9	0	0	100	4	0
CLD 1A - 100/9	4	0	100	4	36
CLD 1A - 100/9	8	0	100	2	15
CLD 1A - 100/9	12	0	100	2	57
CLD 1A - 100/9	16	0	100	2	41
CLD 1A - 100/10	0	0	100	4	0
CLD 1A - 100/10	4	0	100	3	30
CLD 1A - 100/10	8	0	100	2	43
CLD 1A - 100/10	12	0	100	2	52
CLD 1A - 100/10	16	0	100	2	27
CLD 1B - 0/1	0	0	0	4	0
CLD 1B - 0/1	4	0	0	4	55
CLD 1B - 0/1	8	0	0	4	66
CLD 1B - 0/1	12	0	0	4	71
CLD 1B - 0/1	16	0	0	4	71
CLD 1B - 0/2	0	0	0	4	0
CLD 1B - 0/2	4	0	0	4	53
CLD 1B - 0/2	8	0	0	4	56
CLD 1B - 0/2	12	0	0	4	64
CLD 1B - 0/2	16	0	0	7	71
CLD 1B - 0/3	0	0	0	4	0
CLD 1B - 0/3	4	0	0	4	62
CLD 1B - 0/3	8	0	0	4	65
CLD 1B - 0/3	12	0	0	4	69
CLD 1B - 0/3	16	0	0	3	61
CLD 1B - 0/4	0	0	0	4	0
CLD 1B - 0/4	4	0	0	4	48
CLD 1B - 0/4	8	0	0	4	57
CLD 1B - 0/4	12	0	0	3	66
CLD 1B - 0/4	16	0	0	3	67
CLD 1B - 0/5	0	0	0	4	0
CLD 1B - 0/5	4	0	0	4	50
CLD 1B - 0/5	8	0	0	4	46
CLD 1B - 0/5	12	0	0	2	37
CLD 1B - 0/5	16	0	0	1	16
CLD 1B - 0/6	0	0	0	4	0
CLD 1B - 0/6	4	0	0	4	49
CLD 1B - 0/6	8	0	0	3	53
CLD 1B - 0/6	12	0	0	2	65
CLD 1B - 0/6	16	0	0	2	65
CLD 1B - 0/7	0	0	0	4	0
CLD 1B - 0/7	4	0	0	4	46
CLD 1B - 0/7	8	0	0	4	62
CLD 1B - 0/7	12	0	0	4	69
CLD 1B - 0/7	16	0	0	4	68
CLD 1B - 0/8	0	0	0	4	0
CLD 1B - 0/8	4	0	0	4	60
CLD 1B - 0/8	8	0	0	4	68
CLD 1B - 0/8	12	0	0	4	70
CLD 1B - 0/8	16	0	0	4	71
CLD 1B - 0/9	0	0	0	4	0
CLD 1B - 0/9	4	0	0	4	44
CLD 1B - 0/9	8	0	0	4	52
CLD 1B - 0/9	12	0	0	3	67
CLD 1B - 0/9	16	0	0	2	56
CLD 1B - 0/10	0	0	0	4	0
CLD 1B - 0/10	4	0	0	4	57
CLD 1B - 0/10	8	0	0	4	68
CLD 1B - 0/10	12	0	0	4	71
CLD 1B - 0/10	16	0	0	4	71
CLD 1B - 1/1	0	1	1	4	0
CLD 1B - 1/1	4	1	1	4	45
CLD 1B - 1/1	8	1	1	4	66
CLD 1B - 1/1	12	1	1	4	55
CLD 1B - 1/1	16	1	1	4	69
CLD 1B - 1/2	0	1	1	4	0
CLD 1B - 1/2	4	1	1	4	59
CLD 1B - 1/2	8	1	1	4	69
CLD 1B - 1/2	12	1	1	2	70
CLD 1B - 1/2	16	1	1	2	56
CLD 1B - 1/3	0	1	1	4	0
CLD 1B - 1/3	4	1	1	4	59
CLD 1B - 1/3	8	1	1	4	69
CLD 1B - 1/3	12	1	1	4	70
CLD 1B - 1/3	16	1	1	4	71
CLD 1B - 1/4	0	1	1	4	0
CLD 1B - 1/4	4	1	1	3	58
CLD 1B - 1/4	8	1	1	2	54
CLD 1B - 1/4	12	1	1	1	59
CLD 1B - 1/4	16	1	1	1	40
CLD 1B - 1/5	0	1	1	4	0
CLD 1B - 1/5	4	1	1	4	64
CLD 1B - 1/5	8	1	1	4	70
CLD 1B - 1/5	12	1	1	4	71
CLD 1B - 1/5	16	1	1	4	69
CLD 1B - 1/6	0	1	1	4	0
CLD 1B - 1/6	4	1	1	4	63
CLD 1B - 1/6	8	1	1	4	70
CLD 1B - 1/6	12	1	1	4	71
CLD 1B - 1/6	16	1	1	4	66
CLD 1B - 1/7	0	1	1	4	0
CLD 1B - 1/7	4	1	1	4	70
CLD 1B - 1/7	8	1	1	4	69
CLD 1B - 1/7	12	1	1	4	70
CLD 1B - 1/7	16	1	1	4	71
CLD 1B - 1/8	0	1	1	4	0
CLD 1B - 1/8	4	1	1	4	64
CLD 1B - 1/8	8	1	1	4	71
CLD 1B - 1/8	12	1	1	4	70
CLD 1B - 1/8	16	1	1	4	71
CLD 1B - 1/9	0	1	1	4	0
CLD 1B - 1/9	4	1	1	4	54
CLD 1B - 1/9	8	1	1	4	66
CLD 1B - 1/9	12	1	1	3	69
CLD 1B - 1/9	16	1	1	1	44
CLD 1B - 1/10	0	1	1	4	0
CLD 1B - 1/10	4	1	1	4	52
CLD 1B - 1/10	8	1	1	3	65
CLD 1B - 1/10	12	1	1	3	70
CLD 1B - 1/10	16	1	1	3	68
CLD 1B - 5/1	0	5	5	4	0
CLD 1B - 5/1	4	5	5	4	52
CLD 1B - 5/1	8	5	5	4	68
CLD 1B - 5/1	12	5	5	4	69
CLD 1B - 5/1	16	5	5	3	66
CLD 1B - 5/2	0	5	5	4	0
CLD 1B - 5/2	4	5	5	4	52
CLD 1B - 5/2	8	5	5	3	64
CLD 1B - 5/2	12	5	5	3	70
CLD 1B - 5/2	16	5	5	3	67
CLD 1B - 5/3	0	5	5	4	0
CLD 1B - 5/3	4	5	5	4	57
CLD 1B - 5/3	8	5	5	3	65
CLD 1B - 5/3	12	5	5	3	68
CLD 1B - 5/3	16	5	5	3	69
CLD 1B - 5/4	0	5	5	4	0
CLD 1B - 5/4	4	5	5	4	56
CLD 1B - 5/4	8	5	5	3	64
CLD 1B - 5/4	12	5	5	3	70
CLD 1B - 5/4	16	5	5	3	68
CLD 1B - 5/5	0	5	5	4	0
CLD 1B - 5/5	4	5	5	4	60
CLD 1B - 5/5	8	5	5	3	64
CLD 1B - 5/5	12	5	5	3	71
CLD 1B - 5/5	16	5	5	2	37
CLD 1B - 5/6	0	5	5	4	0
CLD 1B - 5/6	4	5	5	4	60
CLD 1B - 5/6	8	5	5	4	65
CLD 1B - 5/6	12	5	5	3	67
CLD 1B - 5/6	16	5	5	3	64
CLD 1B - 5/7	0	5	5	4	0
CLD 1B - 5/7	4	5	5	4	50
CLD 1B - 5/7	8	5	5	4	68
CLD 1B - 5/7	12	5	5	4	69
CLD 1B - 5/7	16	5	5	4	72
CLD 1B - 5/8	0	5	5	4	0
CLD 1B - 5/8	4	5	5	4	62
CLD 1B - 5/8	8	5	5	4	65
CLD 1B - 5/8	12	5	5	4	70
CLD 1B - 5/8	16	5	5	4	68
CLD 1B - 5/9	0	5	5	4	0
CLD 1B - 5/9	4	5	5	4	42
CLD 1B - 5/9	8	5	5	4	67
CLD 1B - 5/9	12	5	5	4	69
CLD 1B - 5/9	16	5	5	4	69
CLD 1B - 5/10	0	5	5	4	0
CLD 1B - 5/10	4	5	5	4	52
CLD 1B - 5/10	8	5	5	4	63
CLD 1B - 5/10	12	5	5	3	64
CLD 1B - 5/10	16	5	5	3	67
CLD 1B - 10/1	0	10	10	4	0
CLD 1B - 10/1	4	10	10	4	62
CLD 1B - 10/1	8	10	10	4	69
CLD 1B - 10/1	12	10	10	4	70
CLD 1B - 10/1	16	10	10	4	69
CLD 1B - 10/2	0	10	10	4	0
CLD 1B - 10/2	4	10	10	4	59
CLD 1B - 10/2	8	10	10	4	62
CLD 1B - 10/2	12	10	10	3	67
CLD 1B - 10/2	16	10	10	3	64
CLD 1B - 10/3	0	10	10	4	0
CLD 1B - 10/3	4	10	10	4	57
CLD 1B - 10/3	8	10	10	3	53
CLD 1B - 10/3	12	10	10	1	69
CLD 1B - 10/3	16	10	10	1	35
CLD 1B - 10/4	0	10	10	4	0
CLD 1B - 10/4	4	10	10	4	59
CLD 1B - 10/4	8	10	10	4	65
CLD 1B - 10/4	12	10	10	4	70
CLD 1B - 10/4	16	10	10	4	71
CLD 1B - 10/5	0	10	10	4	0
CLD 1B - 10/5	4	10	10	4	54
CLD 1B - 10/5	8	10	10	4	60
CLD 1B - 10/5	12	10	10	4	71
CLD 1B - 10/5	16	10	10	4	70
CLD 1B - 10/6	0	10	10	4	0
CLD 1B - 10/6	4	10	10	4	53
CLD 1B - 10/6	8	10	10	4	63
CLD 1B - 10/6	12	10	10	4	68
CLD 1B - 10/6	16	10	10	3	65
CLD 1B - 10/7	0	10	10	4	0
CLD 1B - 10/7	4	10	10	4	58
CLD 1B - 10/7	8	10	10	4	67
CLD 1B - 10/7	12	10	10	4	67
CLD 1B - 10/7	16	10	10	4	67
CLD 1B - 10/8	0	10	10	4	0
CLD 1B - 10/8	4	10	10	4	51
CLD 1B - 10/8	8	10	10	4	55
CLD 1B - 10/8	12	10	10	4	67
CLD 1B - 10/8	16	10	10	4	68
CLD 1B - 10/9	0	10	10	4	0
CLD 1B - 10/9	4	10	10	4	62
CLD 1B - 10/9	8	10	10	4	64
CLD 1B - 10/9	12	10	10	4	70
CLD 1B - 10/9	16	10	10	4	71
CLD 1B - 10/10	0	10	10	4	0
CLD 1B - 10/10	4	10	10	4	58
CLD 1B - 10/10	8	10	10	4	68
CLD 1B - 10/10	12	10	10	4	71
CLD 1B - 10/10	16	10	10	4	71
CLD 1B - 20/1	0	20	20	4	0
CLD 1B - 20/1	4	20	20	4	40
CLD 1B - 20/1	8	20	20	3	53
CLD 1B - 20/1	12	20	20	3	61
CLD 1B - 20/1	16	20	20	3	71
CLD 1B - 20/2	0	20	20	4	0
CLD 1B - 20/2	4	20	20	4	40
CLD 1B - 20/2	8	20	20	3	44
CLD 1B - 20/2	12	20	20	2	58
CLD 1B - 20/2	16	20	20	2	65
CLD 1B - 20/3	0	20	20	4	0
CLD 1B - 20/3	4	20	20	4	59
CLD 1B - 20/3	8	20	20	4	60
CLD 1B - 20/3	12	20	20	4	63
CLD 1B - 20/3	16	20	20	4	63
CLD 1B - 20/4	0	20	20	4	0
CLD 1B - 20/4	4	20	20	4	52
CLD 1B - 20/4	8	20	20	4	59
CLD 1B - 20/4	12	20	20	4	70
CLD 1B - 20/4	16	20	20	4	69
CLD 1B - 20/5	0	20	20	4	0
CLD 1B - 20/5	4	20	20	3	54
CLD 1B - 20/5	8	20	20	3	55
CLD 1B - 20/5	12	20	20	3	68
CLD 1B - 20/5	16	20	20	3	67
CLD 1B - 20/6	0	20	20	4	0
CLD 1B - 20/6	4	20	20	4	63
CLD 1B - 20/6	8	20	20	4	64
CLD 1B - 20/6	12	20	20	3	65
CLD 1B - 20/6	16	20	20	3	69
CLD 1B - 20/7	0	20	20	4	0
CLD 1B - 20/7	4	20	20	4	63
CLD 1B - 20/7	8	20	20	4	66
CLD 1B - 20/7	12	20	20	4	70
CLD 1B - 20/7	16	20	20	4	67
CLD 1B - 20/8	0	20	20	4	0
CLD 1B - 20/8	4	20	20	4	56
CLD 1B - 20/8	8	20	20	4	70
CLD 1B - 20/8	12	20	20	4	70
CLD 1B - 20/8	16	20	20	4	71
CLD 1B - 20/9	0	20	20	4	0
CLD 1B - 20/9	4	20	20	4	56
CLD 1B - 20/9	8	20	20	4	68
CLD 1B - 20/9	12	20	20	4	70
CLD 1B - 20/9	16	20	20	2	71
CLD 1B - 20/10	0	20	20	4	0
CLD 1B - 20/10	4	20	20	4	53
CLD 1B - 20/10	8	20	20	4	66
CLD 1B - 20/10	12	20	20	3	63
CLD 1B - 20/10	16	20	20	3	69
CLD 1B - 100/1	0	100	100	4	0
CLD 1B - 100/1	4	100	100	4	9
CLD 1B - 100/1	8	100	100	2	17
CLD 1B - 100/1	12	100	100	0	0
CLD 1B - 100/1	16	100	100	0	0
CLD 1B - 100/2	0	100	100	4	0
CLD 1B - 100/2	4	100	100	4	14
CLD 1B - 100/2	8	100	100	4	46
CLD 1B - 100/2	12	100	100	4	64
CLD 1B - 100/2	16	100	100	4	65
CLD 1B - 100/3	0	100	100	4	0
CLD 1B - 100/3	4	100	100	4	11
CLD 1B - 100/3	8	100	100	4	42
CLD 1B - 100/3	12	100	100	4	64
CLD 1B - 100/3	16	100	100	4	69
CLD 1B - 100/4	0	100	100	4	0
CLD 1B - 100/4	4	100	100	4	11
CLD 1B - 100/4	8	100	100	4	49
CLD 1B - 100/4	12	100	100	3	49
CLD 1B - 100/4	16	100	100	1	25
CLD 1B - 100/5	0	100	100	4	0
CLD 1B - 100/5	4	100	100	4	9
CLD 1B - 100/5	8	100	100	4	47
CLD 1B - 100/5	12	100	100	3	54
CLD 1B - 100/5	16	100	100	3	58
CLD 1B - 100/6	0	100	100	4	0
CLD 1B - 100/6	4	100	100	4	8
CLD 1B - 100/6	8	100	100	4	42
CLD 1B - 100/6	12	100	100	4	54
CLD 1B - 100/6	16	100	100	4	68
CLD 1B - 100/7	0	100	100	4	0
CLD 1B - 100/7	4	100	100	4	22
CLD 1B - 100/7	8	100	100	4	39
CLD 1B - 100/7	12	100	100	4	61
CLD 1B - 100/7	16	100	100	4	70
CLD 1B - 100/8	0	100	100	4	0
CLD 1B - 100/8	4	100	100	4	14
CLD 1B - 100/8	8	100	100	4	46
CLD 1B - 100/8	12	100	100	4	57
CLD 1B - 100/8	16	100	100	4	65
CLD 1B - 100/9	0	100	100	4	0
CLD 1B - 100/9	4	100	100	4	9
CLD 1B - 100/9	8	100	100	4	36
CLD 1B - 100/9	12	100	100	2	52
CLD 1B - 100/9	16	100	100	2	25
CLD 1B - 100/10	0	100	100	4	0
CLD 1B - 100/10	4	100	100	4	10
CLD 1B - 100/10	8	100	100	4	35
CLD 1B - 100/10	12	100	100	4	59
CLD 1B - 100/10	16	100	100	4	70
CLD 1C - 0/1	0	0	0	4	0
CLD 1C - 0/1	4	0	0	4	44
CLD 1C - 0/1	8	0	0	4	57
CLD 1C - 0/1	12	0	0	3	66
CLD 1C - 0/1	16	0	0	3	67
CLD 1C - 0/2	0	0	0	4	0
CLD 1C - 0/2	4	0	0	4	51
CLD 1C - 0/2	8	0	0	4	64
CLD 1C - 0/2	12	0	0	4	71
CLD 1C - 0/2	16	0	0	4	70
CLD 1C - 0/3	0	0	0	4	0
CLD 1C - 0/3	4	0	0	4	56
CLD 1C - 0/3	8	0	0	4	64
CLD 1C - 0/3	12	0	0	4	71
CLD 1C - 0/3	16	0	0	4	70
CLD 1C - 0/4	0	0	0	4	0
CLD 1C - 0/4	4	0	0	4	49
CLD 1C - 0/4	8	0	0	4	60
CLD 1C - 0/4	12	0	0	4	67
CLD 1C - 0/4	16	0	0	4	69
CLD 1C - 0/5	0	0	0	4	0
CLD 1C - 0/5	4	0	0	4	45
CLD 1C - 0/5	8	0	0	4	60
CLD 1C - 0/5	12	0	0	4	65
CLD 1C - 0/5	16	0	0	4	63
CLD 1C - 0/6	0	0	0	4	0
CLD 1C - 0/6	4	0	0	4	41
CLD 1C - 0/6	8	0	0	4	60
CLD 1C - 0/6	12	0	0	4	70
CLD 1C - 0/6	16	0	0	4	66
CLD 1C - 0/7	0	0	0	4	0
CLD 1C - 0/7	4	0	0	4	49
CLD 1C - 0/7	8	0	0	4	58
CLD 1C - 0/7	12	0	0	4	70
CLD 1C - 0/7	16	0	0	4	68
CLD 1C - 0/8	0	0	0	4	0
CLD 1C - 0/8	4	0	0	4	47
CLD 1C - 0/8	8	0	0	4	52
CLD 1C - 0/8	12	0	0	4	62
CLD 1C - 0/8	16	0	0	3	67
CLD 1C - 0/9	0	0	0	4	0
CLD 1C - 0/9	4	0	0	4	56
CLD 1C - 0/9	8	0	0	4	66
CLD 1C - 0/9	12	0	0	4	67
CLD 1C - 0/9	16	0	0	4	69
CLD 1C - 0/10	0	0	0	4	0
CLD 1C - 0/10	4	0	0	3	43
CLD 1C - 0/10	8	0	0	2	53
CLD 1C - 0/10	12	0	0	1	65
CLD 1C - 0/10	16	0	0	1	26
CLD 1C - 1/1	0	1	0	4	0
CLD 1C - 1/1	4	1	0	4	55
CLD 1C - 1/1	8	1	0	4	69
CLD 1C - 1/1	12	1	0	4	71
CLD 1C - 1/1	16	1	0	4	70
CLD 1C - 1/2	0	1	0	4	0
CLD 1C - 1/2	4	1	0	4	59
CLD 1C - 1/2	8	1	0	4	68
CLD 1C - 1/2	12	1	0	4	70
CLD 1C - 1/2	16	1	0	4	69
CLD 1C - 1/3	0	1	0	4	0
CLD 1C - 1/3	4	1	0	4	54
CLD 1C - 1/3	8	1	0	4	70
CLD 1C - 1/3	12	1	0	4	70
CLD 1C - 1/3	16	1	0	4	69
CLD 1C - 1/4	0	1	0	4	0
CLD 1C - 1/4	4	1	0	4	48
CLD 1C - 1/4	8	1	0	3	48
CLD 1C - 1/4	12	1	0	2	37
CLD 1C - 1/4	16	1	0	2	23
CLD 1C - 1/5	0	1	0	4	0
CLD 1C - 1/5	4	1	0	4	48
CLD 1C - 1/5	8	1	0	3	53
CLD 1C - 1/5	12	1	0	3	69
CLD 1C - 1/5	16	1	0	3	70
CLD 1C - 1/6	0	1	0	4	0
CLD 1C - 1/6	4	1	0	4	67
CLD 1C - 1/6	8	1	0	4	65
CLD 1C - 1/6	12	1	0	4	71
CLD 1C - 1/6	16	1	0	4	69
CLD 1C - 1/7	0	1	0	4	0
CLD 1C - 1/7	4	1	0	4	63
CLD 1C - 1/7	8	1	0	4	67
CLD 1C - 1/7	12	1	0	4	71
CLD 1C - 1/7	16	1	0	4	69
CLD 1C - 1/8	0	1	0	4	0
CLD 1C - 1/8	4	1	0	4	44
CLD 1C - 1/8	8	1	0	4	66
CLD 1C - 1/8	12	1	0	4	69
CLD 1C - 1/8	16	1	0	4	71
CLD 1C - 1/9	0	1	0	4	0
CLD 1C - 1/9	4	1	0	4	52
CLD 1C - 1/9	8	1	0	4	65
CLD 1C - 1/9	12	1	0	4	68
CLD 1C - 1/9	16	1	0	4	70
CLD 1C - 1/10	0	1	0	4	0
CLD 1C - 1/10	4	1	0	4	50
CLD 1C - 1/10	8	1	0	4	67
CLD 1C - 1/10	12	1	0	3	71
CLD 1C - 1/10	16	1	0	3	70
CLD 1C - 5/1	0	5	0	4	0
CLD 1C - 5/1	4	5	0	4	59
CLD 1C - 5/1	8	5	0	4	61
CLD 1C - 5/1	12	5	0	4	69
CLD 1C - 5/1	16	5	0	4	67
CLD 1C - 5/2	0	5	0	4	0
CLD 1C - 5/2	4	5	0	4	50
CLD 1C - 5/2	8	5	0	4	63
CLD 1C - 5/2	12	5	0	4	65
CLD 1C - 5/2	16	5	0	4	68
CLD 1C - 5/3	0	5	0	4	0
CLD 1C - 5/3	4	5	0	4	49
CLD 1C - 5/3	8	5	0	4	67
CLD 1C - 5/3	12	5	0	3	62
CLD 1C - 5/3	16	5	0	3	71
CLD 1C - 5/4	0	5	0	4	0
CLD 1C - 5/4	4	5	0	4	59
CLD 1C - 5/4	8	5	0	3	65
CLD 1C - 5/4	12	5	0	3	69
CLD 1C - 5/4	16	5	0	3	65
CLD 1C - 5/5	0	5	0	4	0
CLD 1C - 5/5	4	5	0	4	60
CLD 1C - 5/5	8	5	0	4	66
CLD 1C - 5/5	12	5	0	4	71
CLD 1C - 5/5	16	5	0	4	71
CLD 1C - 5/6	0	5	0	4	0
CLD 1C - 5/6	4	5	0	4	59
CLD 1C - 5/6	8	5	0	4	69
CLD 1C - 5/6	12	5	0	3	68
CLD 1C - 5/6	16	5	0	3	68
CLD 1C - 5/7	0	5	0	4	0
CLD 1C - 5/7	4	5	0	4	66
CLD 1C - 5/7	8	5	0	4	68
CLD 1C - 5/7	12	5	0	4	71
CLD 1C - 5/7	16	5	0	4	69
CLD 1C - 5/8	0	5	0	4	0
CLD 1C - 5/8	4	5	0	4	66
CLD 1C - 5/8	8	5	0	4	69
CLD 1C - 5/8	12	5	0	4	71
CLD 1C - 5/8	16	5	0	4	71
CLD 1C - 5/9	0	5	0	4	0
CLD 1C - 5/9	4	5	0	4	47
CLD 1C - 5/9	8	5	0	4	9
CLD 1C - 5/9	12	5	0	4	62
CLD 1C - 5/9	16	5	0	3	64
CLD 1C - 5/10	0	5	0	4	0
CLD 1C - 5/10	4	5	0	4	54
CLD 1C - 5/10	8	5	0	4	62
CLD 1C - 5/10	12	5	0	4	70
CLD 1C - 5/10	16	5	0	4	71
CLD 1C - 10/1	0	10	0	4	0
CLD 1C - 10/1	4	10	0	4	44
CLD 1C - 10/1	8	10	0	4	51
CLD 1C - 10/1	12	10	0	4	61
CLD 1C - 10/1	16	10	0	4	71
CLD 1C - 10/2	0	10	0	4	0
CLD 1C - 10/2	4	10	0	4	49
CLD 1C - 10/2	8	10	0	3	53
CLD 1C - 10/2	12	10	0	1	43
CLD 1C - 10/2	16	10	0	1	35
CLD 1C - 10/3	0	10	0	4	0
CLD 1C - 10/3	4	10	0	4	59
CLD 1C - 10/3	8	10	0	4	66
CLD 1C - 10/3	12	10	0	4	70
CLD 1C - 10/3	16	10	0	4	71
CLD 1C - 10/4	0	10	0	4	0
CLD 1C - 10/4	4	10	0	4	50
CLD 1C - 10/4	8	10	0	4	65
CLD 1C - 10/4	12	10	0	4	70
CLD 1C - 10/4	16	10	0	4	70
CLD 1C - 10/5	0	10	0	4	0
CLD 1C - 10/5	4	10	0	4	45
CLD 1C - 10/5	8	10	0	4	59
CLD 1C - 10/5	12	10	0	4	69
CLD 1C - 10/5	16	10	0	4	69
CLD 1C - 10/6	0	10	0	4	0
CLD 1C - 10/6	4	10	0	4	55
CLD 1C - 10/6	8	10	0	4	57
CLD 1C - 10/6	12	10	0	4	70
CLD 1C - 10/6	16	10	0	3	69
CLD 1C - 10/7	0	10	0	4	0
CLD 1C - 10/7	4	10	0	4	48
CLD 1C - 10/7	8	10	0	4	54
CLD 1C - 10/7	12	10	0	4	64
CLD 1C - 10/7	16	10	0	4	69
CLD 1C - 10/8	0	10	0	4	0
CLD 1C - 10/8	4	10	0	4	52
CLD 1C - 10/8	8	10	0	4	61
CLD 1C - 10/8	12	10	0	4	70
CLD 1C - 10/8	16	10	0	4	68
CLD 1C - 10/9	0	10	0	4	0
CLD 1C - 10/9	4	10	0	4	46
CLD 1C - 10/9	8	10	0	4	64
CLD 1C - 10/9	12	10	0	4	67
CLD 1C - 10/9	16	10	0	4	71
CLD 1C - 10/10	0	10	0	4	0
CLD 1C - 10/10	4	10	0	4	51
CLD 1C - 10/10	8	10	0	2	49
CLD 1C - 10/10	12	10	0	2	61
CLD 1C - 10/10	16	10	0	2	47
CLD 1C - 20/1	0	20	0	4	0
CLD 1C - 20/1	4	20	0	4	41
CLD 1C - 20/1	8	20	0	3	52
CLD 1C - 20/1	12	20	0	3	62
CLD 1C - 20/1	16	20	0	3	67
CLD 1C - 20/2	0	20	0	4	0
CLD 1C - 20/2	4	20	0	4	50
CLD 1C - 20/2	8	20	0	4	65
CLD 1C - 20/2	12	20	0	4	63
CLD 1C - 20/2	16	20	0	4	66
CLD 1C - 20/3	0	20	0	4	0
CLD 1C - 20/3	4	20	0	4	40
CLD 1C - 20/3	8	20	0	4	55
CLD 1C - 20/3	12	20	0	4	66
CLD 1C - 20/3	16	20	0	3	67
CLD 1C - 20/4	0	20	0	4	0
CLD 1C - 20/4	4	20	0	3	45
CLD 1C - 20/4	8	20	0	2	47
CLD 1C - 20/4	12	20	0	2	39
CLD 1C - 20/4	16	20	0	2	13
CLD 1C - 20/5	0	20	0	4	0
CLD 1C - 20/5	4	20	0	4	44
CLD 1C - 20/5	8	20	0	0	29
CLD 1C - 20/5	12	20	0	0	0
CLD 1C - 20/5	16	20	0	0	0
CLD 1C - 20/6	0	20	0	4	0
CLD 1C - 20/6	4	20	0	4	46
CLD 1C - 20/6	8	20	0	4	47
CLD 1C - 20/6	12	20	0	4	63
CLD 1C - 20/6	16	20	0	4	64
CLD 1C - 20/7	0	20	0	4	0
CLD 1C - 20/7	4	20	0	4	40
CLD 1C - 20/7	8	20	0	4	62
CLD 1C - 20/7	12	20	0	3	67
CLD 1C - 20/7	16	20	0	3	64
CLD 1C - 20/8	0	20	0	4	0
CLD 1C - 20/8	4	20	0	4	40
CLD 1C - 20/8	8	20	0	3	49
CLD 1C - 20/8	12	20	0	3	56
CLD 1C - 20/8	16	20	0	3	69
CLD 1C - 20/9	0	20	0	4	0
CLD 1C - 20/9	4	20	0	4	43
CLD 1C - 20/9	8	20	0	4	59
CLD 1C - 20/9	12	20	0	4	71
CLD 1C - 20/9	16	20	0	4	68
CLD 1C - 20/10	0	20	0	4	0
CLD 1C - 20/10	4	20	0	4	48
CLD 1C - 20/10	8	20	0	4	60
CLD 1C - 20/10	12	20	0	4	67
CLD 1C - 20/10	16	20	0	4	66
CLD 1C - 100/1	0	100	0	4	0
CLD 1C - 100/1	4	100	0	4	14
CLD 1C - 100/1	8	100	0	4	59
CLD 1C - 100/1	12	100	0	3	64
CLD 1C - 100/1	16	100	0	3	67
CLD 1C - 100/2	0	100	0	4	0
CLD 1C - 100/2	4	100	0	4	16
CLD 1C - 100/2	8	100	0	4	52
CLD 1C - 100/2	12	100	0	3	60
CLD 1C - 100/2	16	100	0	3	68
CLD 1C - 100/3	0	100	0	4	0
CLD 1C - 100/3	4	100	0	4	17
CLD 1C - 100/3	8	100	0	3	49
CLD 1C - 100/3	12	100	0	3	68
CLD 1C - 100/3	16	100	0	1	19
CLD 1C - 100/4	0	100	0	4	0
CLD 1C - 100/4	4	100	0	4	21
CLD 1C - 100/4	8	100	0	4	50
CLD 1C - 100/4	12	100	0	4	52
CLD 1C - 100/4	16	100	0	4	64
CLD 1C - 100/5	0	100	0	4	0
CLD 1C - 100/5	4	100	0	4	16
CLD 1C - 100/5	8	100	0	4	46
CLD 1C - 100/5	12	100	0	3	60
CLD 1C - 100/5	16	100	0	3	65
CLD 1C - 100/6	0	100	0	4	0
CLD 1C - 100/6	4	100	0	4	19
CLD 1C - 100/6	8	100	0	4	50
CLD 1C - 100/6	12	100	0	3	62
CLD 1C - 100/6	16	100	0	3	64
CLD 1C - 100/7	0	100	0	4	0
CLD 1C - 100/7	4	100	0	4	14
CLD 1C - 100/7	8	100	0	4	57
CLD 1C - 100/7	12	100	0	4	59
CLD 1C - 100/7	16	100	0	4	71
CLD 1C - 100/8	0	100	0	4	0
CLD 1C - 100/8	4	100	0	4	18
CLD 1C - 100/8	8	100	0	3	55
CLD 1C - 100/8	12	100	0	2	53
CLD 1C - 100/8	16	100	0	2	40
CLD 1C - 100/9	0	100	0	4	0
CLD 1C - 100/9	4	100	0	4	19
CLD 1C - 100/9	8	100	0	4	67
CLD 1C - 100/9	12	100	0	4	71
CLD 1C - 100/9	16	100	0	4	68
CLD 1C - 100/10	0	100	0	4	0
CLD 1C - 100/10	4	100	0	4	15
CLD 1C - 100/10	8	100	0	4	54
CLD 1C - 100/10	12	100	0	4	63
CLD 1C - 100/10	16	100	0	4	71
